# Supplementary material
Source: PubMed Central journal article supplement (PMC1257744)
Supplement: pnas_0507682102_1.pdf [file pnas_0507682102_1.pdf]

1

60

|         |     |     |     |     |     |     |     |     |     |     |     |     |     |     |     |     |     |     |     |      |
|---------|-----|-----|-----|-----|-----|-----|-----|-----|-----|-----|-----|-----|-----|-----|-----|-----|-----|-----|-----|------|
| Hol-DNA | .GT | TGT | GGA | GCA | CTC | GGT | TGT | ATA | AGT | AGT | TAA | AAT | GGA | ACA | AGC | ACA | TAG | TTC | AAA | AAC  |
| Sn-DNA  | ... | ... | ... | ... | ... | ... | ... | ... | ... | ... | ..c | ccc | aaa | acc | cca | aaa | ccc | cTC | TAG | TTA  |
| S1-DNA  | ... | ... | ... | ... | ... | ... | ... | ... | ... | ... | ... | ... | ... | ... | ... | ... | ..a | aaa | ccc | caa  |
| Sh-DNA  | ... | ... | ... | ... | ... | ... | ... | ... | ... | ... | ... | ... | ... | ... | ... | ... | ... | ... | ... | ..cc |

61

120

|          |     |     |     |     |     |     |     |     |     |     |     |     |     |     |     |     |     |     |     |     |
|----------|-----|-----|-----|-----|-----|-----|-----|-----|-----|-----|-----|-----|-----|-----|-----|-----|-----|-----|-----|-----|
| Ug1-DNA  | ... | ... | ... | ... | ... | ... | ... | ... | ... | ... | ... | ... | ... | ..a | aaa | ccc | caa | aac | ccc | TAA |
| Ug2-DNA  | ... | ... | ... | ... | ... | ... | ... | ... | ... | ... | ... | ... | ... | ..a | aaa | ccc | caa | aac | ccc | TAA |
| Hol-DNA  | CAT | TAA | AGA | AGC | TAG | TTG | TAA | TTA | AGC | CAA | AAC | TAT | GAA | TTT | GAT | TTA | ATT | AAT | ATA | ATT |
| UroL-DNA | ..c | ccc | aaa | acc | cca | aaa | ccc | caa | aac | ccc | AAA | AAC | CAT | AAA | CCC | ACT | TAT | TGA | AAA | TTA |
| Pw-DNA   | ... | ... | ... | ... | ... | ... | ... | ..a | aaa | ccc | cAT | TCT | ACA | ATA | ATT | ATA | AGT | TGA | TAA | ACA |
| Sn-DNA   | ATC | AAA | GAG | AAA | TCG | AAA | TTA | ATA | GAT | TCC | CGC | TTT | TAA | AGT | ATA | ATA | TTT | AAA | TTT | TGC |
| S1-DNA   | aac | ccc | AAA | ATC | CCA | AAT | CAA | ATT | AAT | AGT | TGA | GRA | ATA | ARA | ATT | GAA | TAA | TRA | TAC | CGC |
| Sh-DNA   | cca | aaa | ccc | caa | aac | ccc | AAT | TCA | AAA | TAG | TAG | GGG | AAT | AAG | TAA | ATT | AAA | TAC | CGC | GTT |

121

MDS 1 1 1 1 1 1

180

|          |     |     |     |     |     |     |     |     |     |     |     |     |     |     |     |     |     |     |     |     |
|----------|-----|-----|-----|-----|-----|-----|-----|-----|-----|-----|-----|-----|-----|-----|-----|-----|-----|-----|-----|-----|
| Ug1-DNA  | TTT | TAT | TAT | TTA | AAA | GAA | AAA | TAC | CGC | CTT | AAT | ATT | ATT | AAT | TTT | AAA | AAA | TCC | AAT | ACA |
| Ug2-DNA  | TTT | TAT | TAT | TTA | AAA | GAA | AAA | TAC | CGC | CTT | AAT | ATT | ATT | AAT | TTT | AAA | AAA | TCC | AAT | ACA |
| Hol-DNA  | TTA | ATT | GAT | TTA | CCG | CCA | ATT | AAG | CTA | ATA | AAG | TCA | AGT | TCA | ATT | TAT | AAT | TTT | AAA | AAT |
| UroL-DNA | AAA | ATT | CTA | ATA | ATA | CCG | CCT | TTA | AAA | TTG | AGA | TTG | ATA | AAT | ATT | TGT | TTA | TAA | TTT | AAA |
| Pw-DNA   | TTT | AAA | ATA | ATA | ATA | CCG | CCT | TAA | ATA | TAA | CAG | AAG | AGT | TAA | TTA | ATT | ACT | TAT | AAT | TTA |
| Sn-DNA   | ACT | CTA | GCA | AAC | AAG | TTA | CCA | TCT | TAA | ACA | CAC | AAT | TTG | ACA | TTA | AAA | TAG | AGT | ... | ... |
| S1-DNA   | GTT | TAA | TCT | WAG | TGG | GAA | TCA | AAG | AAT | GAG | TTT | ATA | ATT | TTA | AAC | TTA | GTC | TAA | ACA | AAR |
| Sh-DNA   | TAA | TCT | ATA | TAT | AAT | TTA | AAA | TTT | GCA | ACA | TTT | GTG | AAC | AGT | CTA | GTT | TGC | GAT | TTT | ACT |

181

MDS 2

240

|          |     |     |     |     |     |     |     |     |     |     |     |     |     |     |     |     |     |     |     |     |
|----------|-----|-----|-----|-----|-----|-----|-----|-----|-----|-----|-----|-----|-----|-----|-----|-----|-----|-----|-----|-----|
| Ug1-DNA  | TTT | TTG | GCT | Cta | aAG | ATG | AGT | ... | ... | AAA | CAA | ACA | ACT | TCA | AGT | ... | GGA | AGA | GTG | ATT |
| Ug1-Prt  | ... | ... | ... | ... | M   | S   | ... | ... | ... | K   | Q   | T   | T   | S   | S   | ... | G   | R   | V   | I   |
| Ug2-DNA  | TTT | TTG | GCT | Cta | aAG | ATG | AGT | ... | ... | AAA | CAA | ACA | ACT | TCA | AGT | ... | GGA | AGA | GTG | ATT |
| Ug2-Prt  | ... | ... | ... | ... | M   | S   | ... | ... | ... | K   | Q   | T   | T   | S   | S   | ... | G   | R   | V   | I   |
| Hol-DNA  | ACT | ACT | ACT | ATT | GCA | ATG | AAC | TAA | GAT | TCC | TAC | CAC | ACT | TCA | AGT | ... | GGA | CGA | GAA | GTC |
| Hol-Prt  | ... | ... | ... | ... | M   | N   | Q   | D   | S   | Y   | H   | T   | S   | S   | ... | G   | R   | E   | V   | ... |
| UroL-DNA | AAA | TCG | CTT | CAA | CTT | ATG | AGT | ... | GAT | TAA | ACA | TAC | ACG | ACA | CAA | TTT | GGA | AGA | GAA | ATC |
| UroL-Prt | ... | ... | ... | ... | M   | S   | ... | ... | D   | Q   | T   | Y   | T   | T   | Q   | F   | G   | R   | E   | I   |
| Pw-DNA   | AAA | TTG | TAT | TGC | AAA | ATG | AGC | ... | GAT | CCA | CAA | CAC | ACA | TCT | AGC | ... | GGA | AGA | GAA | ATC |
| Pw-Prt   | ... | ... | ... | ... | M   | S   | ... | ... | D   | P   | Q   | H   | T   | S   | S   | ... | G   | R   | E   | I   |
| Sn-DNA   | ... | ... | ... | ... | ATG | AGC | ... | GAC | AAC | TAT | ACT | ACT | GCC | CAT | ... | GCA | GAG | AAG | TAA |     |
| Sn-Prt   | ... | ... | ... | ... | M   | S   | ... | ... | D   | N   | Y   | T   | T   | A   | H   | ... | A   | E   | K   | Q   |
| S1-DNA   | CTT | GCA | AAT | AAG | ACG | ATG | AGT | ... | GAT | AAT | TAC | ACA | ACA | CAA | AGT | ... | GGC | AGA | GAA | ATC |
| S1-Prt   | ... | ... | ... | ... | M   | S   | ... | ... | D   | N   | Y   | T   | T   | Q   | S   | ... | G   | R   | E   | I   |
| Sh-DNA   | AAA | AAA | CAA | TTA | TTT | ATG | AGC | ... | GAT | AAG | TAC | ACA | ACA | CAA | TCA | ... | GGA | AGA | GAG | ATT |
| Sh-Prt   | ... | ... | ... | ... | M   | S   | ... | ... | D   | K   | Y   | T   | T   | Q   | S   | ... | G   | R   | E   | I   |

241

300

|          |     |     |     |     |     |     |     |     |     |     |     |     |     |     |     |     |     |     |     |     |
|----------|-----|-----|-----|-----|-----|-----|-----|-----|-----|-----|-----|-----|-----|-----|-----|-----|-----|-----|-----|-----|
| Ug1-DNA  | AAG | AAG | GTA | TCC | GAC | AAA | AAG | ... | ... | CAA | GAT | GCA | CTA | GCT | CAA | ttt | aaG | GCT | GCG | AGA |
| Ug1-Prt  | K   | K   | V   | S   | D   | K   | K   | ... | ... | Q   | D   | A   | L   | A   | Q   | F   | K   | A   | A   | R   |
| Ug2-DNA  | AAG | AAG | GTA | TCC | GAC | AAA | AAA | ... | ... | CAA | GAT | GCA | CTA | GCT | CAA | ttt | aaG | GCT | GCG | AGA |
| Ug2-Prt  | K   | K   | V   | S   | D   | K   | K   | ... | ... | Q   | D   | A   | L   | A   | Q   | F   | K   | A   | A   | R   |
| Hol-DNA  | AAG | AAA | TCT | GGT | AAT | AAA | AAC | GTC | ... | AAA | GGA | GCT | CTG | Gct | taG | TTG | AGA | GCT | GCG | AGA |
| Hol-Prt  | K   | K   | S   | G   | N   | K   | N   | V   | ... | K   | G   | A   | L   | A   | Q   | L   | R   | A   | A   | R   |
| UroL-DNA | AAG | AAA | GCA | GGC | AAG | AGA | GAT | ACT | TCT | ... | GAT | GCT | ATT | TCT | TAA | CTT | AGA | GCT | GCT | AGA |
| UroL-Prt | K   | K   | A   | G   | K   | R   | D   | T   | S   | ... | D   | A   | L   | S   | Q   | L   | R   | A   | A   | R   |
| Pw-DNA   | AAA | AAA | GTT | GGC | AAA | AAA | TCA | GGA | GTT | TCA | GGT | GCC | CTT | GCA | CAA | CTC | AGA | GCT | GCC | AGA |
| Pw-Prt   | K   | K   | V   | G   | K   | K   | S   | G   | V   | S   | G   | A   | L   | A   | Q   | L   | R   | A   | A   | R   |
| Sn-DNA   | AGA | AAG | GTG | GTA | AAG | GAG | AAG | TTG | TTA | AAA | AGG | GAT | TAG | CAG | CTT | TGA | GAG | CAG | CCA | GAG |
| Sn-Prt   | R   | K   | V   | V   | K   | E   | K   | L   | L   | K   | R   | D   | Q   | Q   | L   | *   | E   | Q   | P   | E   |
| S1-DNA   | AAG | AAA | ATC | GGC | TAA | AAA | TCA | GGT | GTT | AAA | AAC | GCT | CTA | GCT | TAA | CTC | AGA | GCT | GCT | AGA |
| S1-Prt   | R   | K   | L   | G   | Q   | K   | S   | G   | V   | K   | N   | A   | L   | A   | Q   | L   | R   | A   | A   | R   |
| Sh-DNA   | AAG | AAA | TCA | GGT | CGT | GGA | GAT | GCT | GCC | AAA | GGC | CCC | TAG | CTC | AAC | TGA | GAG | CTG | CCA | GAG |
| Sh-Prt   | K   | K   | S   | G   | R   | G   | D   | A   | A   | K   | G   | P   | Q   | L   | N   | *   | E   | L   | P   | E   |

301 **MDS 3 2** 360

Ug1-DNA GAA GGA AAA GAG AAA AGA ACC GAA Caa tat aAA ... ..

Ug1-Prt E G K E K R T E Q Y K ... ..

Ug2-DNA GAA GGA AAA GAG AAA AGA ACC GAA Caa tat aAA ... ..

Ug2-Prt E G K E K R T E Q Y K ... ..

Hol-DNA GAA GGC GGT GAC AAG AGA ACT GAC TAG TAT CAG GTA AG. ... ..

Hol-Prt E G G D K R T D Q Y Q ... ..

UroL-DNA GAA GGA GGA TAA AAA AGA ACT GAT CAA TAT TAG GTT AGT CAA ATT TCT TAT AAT CAT TAA

UroL-Prt E G G Q K R T D Q Y Q ... ..

Pw-DNA GAA GGA GGT GAT AAA AGA ACC GAT TAA TAT CAA GTA AT. ... ..

Pw-Prt E G G D K R T D Q Y Q ... ..

Sn-DNA GAA GGT GGA GAC AAG AGA ACT GAC TAG TAC ACA GTA AGTATAA AGC ATT AAT GCT AAT AAT

Sn-Prt E G G D K R T D Q Y T ... ..

Sl-DNA GAG GGT GGA GAT AAG AGA ACT GAT TAA TAT TAA GTA AGG ... ..

Sl-Prt E G G D K R T D Q Y Q ... ..

Sh-DNA GAA GGA GAA AGC AAA AGA ACT GAT CAG TAT TAG GTA AGT G. ... ..

Sh-Prt E G G S K R T D Q Y Q ... ..

361 420

Ug1-DNA ... ..

Ug1-Prt ... ..

Ug2-DNA ... ..

Ug2-Prt ... ..

Hol-DNA ... .. AA AGC AAT CAC AAT TTT AAA TTG CGG TAT TAA CAA ATT TTA ... ..

Hol-Prt ... ..

UroL-DNA ATT TAT ATA TTG ACT TTT TGC CTC TAA TTG CGG TAA TTA TCA ATT TAT G. ... ..

UroL-Prt ... ..

Pw-DNA ... .. AAT TTC ATA TTT TAA TAA atg CGG TAA CTT ACT CA. ... ..

Pw-Prt ... ..

Sn-DNA CTT TCT GAA TGG CTT TTC AAA AAT ATT GCA ACA TCA TCC TCC TTT CTC ATG ATT AAA CAC

Sn-Prt ... ..

Sl-DNA ... .. A ACT AAA TTT AAA GCT TGC AGR AGA ... TGC TAA TCT

Sl-Prt ... ..

Sh-DNA ATG TTC CAT TTA TTA TTG GAA AAT GAA GAA ATT TAA TTT TCA AAC AGT TTT GCT CAG TTT

Sh-Prt ... ..

421 **MDS 4 2** **MDS 2 3 2 2 2** 480

Ug1-DNA ... .. GGC GAT GAA CAT AAG AAG ATT TTT GAG GAA ATT GAT GCC GAA GAA TAC GAT

Ug1-Prt ... .. G D E H K K I F E E I D A E E Y D

Ug2-DNA ... .. GGC GAT GAA CAT AAG AAG ATT TTT GAG GAA ATT GAT GCC GAA GAA TAC GAT

Ug2-Prt ... .. G D E H K K I F E E I D A E E Y D

Hol-DNA ... .. CAG GTA GAA GAA GCC AGA AGA ATT TTT GAA GAA GTC GAT AAT GAT CAA TAC GAT

Hol-Prt ... .. V E E A R R I F E E V D N D Q Y D

UroL-DNA ... .. TAG GTT GAT GAA GCA AAG AAA ATC TTT GCT GAT Ata GAT GAT GAA GAA TAT GAA

UroL-Prt ... .. V D E A K K I F A G I D D E E Y E

Pw-DNA ... .. TAG GTT GAC GAG GCA AAA AGA ATT TTT GAA Gaa atA GAT GCA GAT GAT TAC GAG

Pw-Prt ... .. V D E A K R I F E E I D A D D Y E

Sn-DNA ATT TTA TAG GTT GAA GAA ACA AAA AAG ATC TTT GAA GAG Ata GAT GAC AAC GAA TAT GAA

Sn-Prt ... .. V E E T K K I F E E I D D N E Y E

Sl-DNA TTT ACT TAG GTC GAA GAG GCA AAG AGA ATT TTT GAA GAG Ata GAT GCY GAT GAA TAT GAA

Sl-Prt ... .. E E A R I F E E I D D A D E Y E

Sh-DNA TAC CTA TAG GTT GAT GAA GCC AAG AAA ATA TTT GAT Gag ata GAT GAC GAC GAA TAT GAC

Sh-Prt ... .. V D E A K K I F D E I D D D E Y D

481 MDS 5 540

Ug1-DNA GCA Ctt tat GAT TAG CGT GAG AAT GAT GAT TTC ATC GTC GAT GAT GAT GGC ATT GGC TAT

Ug1-Prt **A** **L** **Y** **D** **Q** **R** **E** **N** **D** **D** **F** **I** **V** **D** **D** **D** **G** **I** **G** **Y**

Ug2-DNA GCA Ctt tat GAT TAG CGT GAG AAT GAT GAT TTC ATT GTC GAT GAT GAT GGC ATA GGC TAT

Ug2-Prt **A** **L** **Y** **D** **Q** **R** **E** **N** **D** **D** **F** **I** **V** **D** **D** **D** **G** **I** **G** **Y**

Hol-DNA AAA TTG CAG GAA GAC AGA TTA AAC GAC GAT TTC ATT GTA GAC GAT GAT GGC TAT GGT TAC

Hol-Prt **K** **L** **Q** **E** **D** **R** **L** **N** **D** **D** **F** **I** **V** **D** **D** **D** **G** **Y** **G** **Y**

UroL-DNA AGA CTA TAA GAT AAG AGA AAG AAC GAT GAT TTC ATT GTC GAT GAT GAA GGG TTT GGG TAC

UroL-Prt **R** **L** **Q** **D** **K** **R** **K** **N** **D** **D** **F** **I** **V** **D** **D** **E** **G** **F** **G** **Y**

Pw-DNA AAG ATT CAA AAT TAA AGG AGA AAC GAC GAT TTT ATC GTC GAT GAT GAT GGC TAT GGC TAT

Pw-Prt **K** **I** **Q** **N** **Q** **R** **R** **N** **D** **D** **F** **I** **V** **D** **D** **D** **G** **Y** **G** **Y**

Sn-DNA AAA ATC TAA GAT TCC CGC AAA AAT GAT GAT TTC ATT GTG GAT GAT GAT GGT TAT GGA TAT

Sn-Prt **K** **I** **Q** **D** **S** **R** **K** **N** **D** **D** **F** **I** **V** **D** **D** **D** **G** **Y** **G** **Y**

Sl-DNA AGA ATT TAW GAT CAA AGG AAA AAT GAT GAT TTC ATT GTK KAT GAT GAT GGY TYT GGC TAC

Sl-Prt **R** **I** **QY** **D** **Q** **R** **K** **N** **D** **D** **F** **I** **V** **DY** **D** **D** **G** **FS** **G** **Y**

Sh-DNA AAA ATT CAA GAT CAA AGA AAG AAC GAT GAT TTC ATT GTT GAC GAC GAT GGT TAT GGT TAT

Sh-Prt **K** **I** **Q** **D** **Q** **R** **K** **N** **D** **D** **F** **I** **V** **D** **D** **D** **G** **Y** **G** **Y**

541 MDS 6 600

Ug1-DNA AAG GAA aag gGC GGA GAG ATT TGG GAC TAT GAA GAA TCC GAT GAT GAC TAT TCA AAT AAG

Ug1-Prt **K** **E** **K** **G** **G** **E** **I** **W** **D** **Y** **E** **E** **S** **D** **D** **D** **Y** **S** **N** **K**

Ug2-DNA AAG GAA aag gGC GGA GAG ATT TGG GAC TAT GAG GAA TCC GAT GAT GAC TAT TCA AAT AAG

Ug2-Prt **K** **E** **K** **G** **G** **E** **I** **W** **D** **Y** **E** **E** **S** **D** **D** **D** **Y** **S** **N** **K**

Hol-DNA AGA GAC CAT GGS GGT GAA ATT TGG GAA GTT GGT GAT AAA GAA GAC GGC GGC AAA AAG

Hol-Prt **R** **D** **H** **G** **G** **E** **I** **W** **E** **V** **G** **D** **F** **K** **E** **D** **G** **G** **K** **K**

UroL-DNA AGA GAT TTT GGC GGC GAA ATA TGG GAA GTA GGC GAT ACC AAA GAA GAA GGC GCT AAA AAG

UroL-Prt **R** **D** **F** **G** **G** **E** **I** **W** **E** **V** **G** **D** **T** **K** **E** **E** **G** **A** **K** **K**

Pw-DNA AGA GAT TTT GGC GGT GAA ATA TGG GAG GCA ACA GAG GGA AAA GAG GAT GGC GGT AAA AAG

Pw-Prt **R** **D** **F** **G** **G** **E** **I** **W** **E** **A** **T** **E** **G** **K** **E** **D** **G** **G** **K** **K**

Sn-DNA CGC GAT CAC GGA GGA GAA ATT TGG GAC AGA GAT GGA GAT GTA GAG GAA GTT GGG AAA AAG

Sn-Prt **R** **D** **H** **G** **G** **E** **I** **W** **E** **R** **D** **G** **D** **V** **E** **E** **V** **G** **K** **K**

Sl-DNA AGA GAT CAT GGA GGT GAA ATC TGG GAA AGA GAT GAC AAC GAA GAG GTT GGC GGT AAA AAG

Sl-Prt **R** **D** **H** **G** **G** **E** **I** **W** **E** **R** **D** **D** **N** **E** **E** **V** **G** **G** **K** **K**

Sh-DNA AGA GAT CAC GGA GGT GAA ATT TGG GAG AGA GAT GAC CAC CCT GAA GAT GGC GGT AAA AAG

Sh-Prt **R** **D** **H** **G** **G** **E** **I** **W** **E** **R** **D** **D** **H** **P** **E** **D** **G** **G** **K** **K**

601 MDS 3 660

Ug1-DNA GAG AAA AAG GTG AAG TCA AAG AAG ... ..

Ug1-Prt **E** **K** **K** **V** **K** **S** **K** **K** ... ..

Ug2-DNA GAG AAA AAG GTG AAG TCA AAG AAG ... ..

Ug2-Prt **E** **K** **K** **V** **K** **S** **K** **K** ... ..

Hol-DNA AAA AAG AAG AGA AAG CTT GAT **GTA** **Cta** **ttc** TTA ACA ATT AAC TAA ATG ... ..

Hol-Prt **K** **K** **K** **R** **K** **L** **D** ... ..

UroL-DNA AAG AGA AGA ... AAG CTT GAT **GTA** ATT TAC CTT ATT TCT AAT AAT ACA AAT A... ..

UroL-Prt **K** **R** **R** ... **K** **L** **D** ... ..

Pw-DNA AAA AGA AGA ... AAG CTA GAT **GTA** AAT AAA TTT CAA TTA ATT TT... ..

Pw-Prt **K** **R** **R** ... **K** **L** **D** ... ..

Sn-DNA AAA AAG AAG AAG CAA AAT AAT CAC ... ..

Sn-Prt **K** **K** **K** **K** **Q** **N** **N** **H** ... ..

Sl-DNA AAA AAG AGA AAG ... CTT GAT **GTA** AGT ATA AAC CAA GTC TTA GTC TAT TKT ATC ATT TAA

Sl-Prt **K** **K** **R** **K** ... **L** **D** ... ..

Sh-DNA AAA AAG ... AGA AAG CTC GAT **GTA** C... GTT TTT TCA TTC TCA CCT AAA TTC ATT GCT TAA

Sh-Prt **K** **K** ... **R** ... **L** **D** ... ..

661 720

|          |     |     |     |     |     |     |     |     |     |     |     |     |     |     |     |     |     |     |     |     |     |     |
|----------|-----|-----|-----|-----|-----|-----|-----|-----|-----|-----|-----|-----|-----|-----|-----|-----|-----|-----|-----|-----|-----|-----|
| Ug1-DNA  | ... | ... | ... | ... | ... | ... | ... | ... | ... | ... | AAG | AAG | CAA | GAA | GGA | GGC | GAT | ATC | GCC | GCA | TTT |     |
| Ug1-Prt  | ... | ... | ... | ... | ... | ... | ... | ... | ... | ... | K   | K   | Q   | E   | G   | G   | D   | I   | A   | A   | F   |     |
| Ug2-DNA  | ... | ... | ... | ... | ... | ... | ... | ... | ... | ... | AAG | AAG | CAA | GAA | GGA | GGC | GAT | ATC | GCC | GCA | TTT |     |
| Ug2-Prt  | ... | ... | ... | ... | ... | ... | ... | ... | ... | ... | K   | K   | Q   | E   | G   | G   | D   | I   | A   | A   | F   |     |
| Hol-DNA  | ... | ... | ... | ... | ... | ... | ... | ... | ... | ... | TG  | TAG | GCA | AAT | GAG | ... | TAA | GAG | ATW | ACA | TCA | TTC |
| Hol-Prt  | ... | ... | ... | ... | ... | ... | ... | ... | ... | ... | A   | N   | E   | ... | Q   | E   | I   | T   | S   | F   | ... |     |
| UroL-DNA | ... | ... | ... | ... | ... | ... | ... | ... | ... | ... | TAG | CCA | AAT | GAA | ... | CAA | TCG | ATA | ACC | AAC | TTC |     |
| UroL-Prt | ... | ... | ... | ... | ... | ... | ... | ... | ... | ... | P   | N   | E   | ... | Q   | S   | I   | T   | N   | F   | ... |     |
| Pw-DNA   | ... | ... | ... | ... | ... | ... | ... | ... | ... | ... | TAG | CCT | AAT | GAA | ... | CAG | CAT | ATC | ACG | AAC | TTT |     |
| Pw-Prt   | ... | ... | ... | ... | ... | ... | ... | ... | ... | ... | P   | N   | E   | ... | Q   | H   | I   | T   | N   | F   | ... |     |
| Sn-DNA   | ... | ... | ... | ... | ... | ... | ... | ... | ... | ... | GAC | CCA | AAT | GAG | ... | ... | AAC | ATT | ATG | AAC | TAT |     |
| Sn-Prt   | ... | ... | ... | ... | ... | ... | ... | ... | ... | ... | L   | P   | N   | E   | ... | ... | N   | I   | M   | N   | Y   |     |
| Sl-DNA   | ATT | CCG | CAA | TTY | ACT | TAC | ATT | ACT | CTA | TAG | CCA | AAT | GAA | ... | CAG | CAC | ATT | ACT | RAC | TTT |     |     |
| Sl-Prt   | ... | ... | ... | ... | ... | ... | ... | ... | ... | ... | P   | N   | E   | ... | Q   | H   | I   | T   | ND  | F   | ... |     |
| Sh-DNA   | ... | CCA | TTA | TTC | ... | ... | ... | ... | TTA | TAG | CCT | AAT | GAG | ... | CAG | TCA | ATC | ACT | GCC | TTT |     |     |
| Sh-Prt   | ... | ... | ... | ... | ... | ... | ... | ... | ... | ... | P   | N   | E   | ... | Q   | S   | I   | T   | A   | F   | ... |     |

721 MDS 7 MDS 8 780

|          |     |     |     |     |     |     |     |     |     |     |     |     |     |     |     |     |     |     |     |     |
|----------|-----|-----|-----|-----|-----|-----|-----|-----|-----|-----|-----|-----|-----|-----|-----|-----|-----|-----|-----|-----|
| Ug1-DNA  | ATG | TTC | CCT | ACT | taG | GGA | CTC | AAC | aaa | aGG | AAG | GGA | ... | GGA | AAT | ACT | GGA | GTT | TAG | GGA |
| Ug1-Prt  | M   | F   | P   | T   | Q   | G   | L   | N   | K   | R   | K   | G   | ... | G   | N   | T   | C   | V   | Q   | G   |
| Ug2-DNA  | ATG | TTC | CCT | ACT | taG | GGA | CTC | AAC | aaa | aGG | AAG | GGA | ... | GGA | AAT | ACT | GGA | GTT | TAG | GGA |
| Ug2-Prt  | M   | F   | P   | T   | Q   | G   | L   | N   | K   | R   | K   | G   | ... | G   | N   | T   | C   | V   | Q   | G   |
| Hol-DNA  | ATG | ATG | CCA | ATG | AGT | ACC | TTA | ACC | AAG | AAG | ... | TAA | VCA | GCC | AAC | AGT | TCA | GVT | YTG | ACT |
| Hol-Prt  | M   | M   | P   | M   | S   | T   | L   | N   | K   | K   | ... | Q   | TPA | G   | N   | S   | S   | G   | L   | T   |
| UroL-DNA | ATG | ATG | CCT | TTA | TCC | ACA | ATT | CCT | AAG | AAA | AAG | AAT | ... | ... | TAA | AGT | ATT | AAC | AAT | TCA |
| UroL-Prt | M   | M   | P   | L   | S   | T   | I   | P   | K   | K   | K   | N   | ... | ... | Q   | S   | I   | N   | N   | S   |
| Pw-DNA   | ATG | ATG | CCT | ATG | ACT | ACT | ATA | CAA | AAA | AAG | AAG | AAC | TTA | GGA | TAA | GGA | GTA | ... | GTT | CAA |
| Pw-Prt   | M   | M   | P   | M   | T   | T   | I   | Q   | K   | K   | K   | N   | L   | G   | Q   | G   | V   | ... | V   | Q   |
| Sn-DNA   | ATG | ATG | CCT | GCT | TCT | ACC | TTG | AAA | AAG | AAG | TCT | AAC | GCT | GCC | ... | TCT | ACT | AAT | CCT | TCA |
| Sn-Prt   | M   | M   | P   | A   | S   | T   | L   | A   | K   | K   | S   | N   | A   | A   | ... | S   | T   | N   | P   | S   |
| Sl-DNA   | ATG | ATG | CCM | GCT | TCA | ACW | ATC | AGA | AAG | AAC | AAA | GGA | AVM | GCC | AAT | TCT | AGC | AAT | ATA | TAG |
| Sl-Prt   | M   | M   | P   | A   | S   | T   | I   | R   | K   | N   | K   | G   | X   | G   | N   | S   | S   | N   | I   | Q   |
| Sh-DNA   | ATG | AAG | CCA | AAG | TCA | ACT | ATA | AAC | AGA | ... | CCA | GGA | GCT | GTG | ACA | AAC | TCC | AGT | GCT | TAA |
| Sh-Prt   | M   | K   | P   | K   | S   | T   | I   | N   | R   | ... | P   | G   | A   | V   | T   | N   | S   | S   | A   | Q   |

781 840

|          |     |     |     |     |     |     |     |     |     |     |     |     |     |     |     |     |     |     |     |     |
|----------|-----|-----|-----|-----|-----|-----|-----|-----|-----|-----|-----|-----|-----|-----|-----|-----|-----|-----|-----|-----|
| Ug1-DNA  | ATT | AAG | AAG | CAA | GGA | AAA | GTT | AAT | GAG | GCT | TAG | TCC | AAG | GAC | TTA | Ctt | aat | GAG | CTG | ATG |
| Ug1-Prt  | I   | K   | K   | Q   | G   | K   | V   | N   | E   | A   | Q   | S   | K   | D   | L   | L   | N   | E   | L   | M   |
| Ug2-DNA  | ATT | AAG | AAG | CAA | GGA | AAA | GTT | AAT | GAG | GCT | TAG | TCC | AAG | GAC | TTA | Ctt | aat | GAG | CTG | ATG |
| Ug2-Prt  | I   | K   | K   | Q   | G   | K   | V   | N   | E   | A   | Q   | S   | K   | D   | L   | L   | N   | E   | L   | M   |
| Hol-DNA  | ATA | AAG | CAA | AAG | CCA | AAA | GTG | ACC | GCA | GAG | TAG | TCT | AAG | GAT | ATC | ATG | AAT | AAC | CTG | TTC |
| Hol-Prt  | I   | K   | Q   | K   | P   | K   | V   | T   | A   | E   | Q   | S   | K   | D   | I   | M   | N   | N   | L   | F   |
| UroL-DNA | ATC | CAA | TAG | AAA | CCA | AAG | ATT | AGT | GAA | GAA | CAA | TAA | AAA | GAC | ATA | ATG | AAT | GAT | TTG | CTT |
| UroL-Prt | I   | Q   | Q   | K   | P   | K   | I   | S   | E   | E   | Q   | Q   | K   | D   | I   | M   | N   | N   | L   | L   |
| Pw-DNA   | ATA | AAT | CAA | AAG | CCG | AAA | GTA | AGC | GCA | GCA | TAG | TCA | AAA | GAT | ATA | ATG | GAT | AAC | TTA | CTT |
| Pw-Prt   | I   | N   | Q   | K   | P   | K   | V   | S   | A   | A   | Q   | S   | K   | D   | I   | M   | D   | N   | L   | L   |
| Sn-DNA   | GCT | CAG | CAA | AAG | CCT | AAA | GTA | TCA | GTT | GAA | TAG | TCG | AGA | GAC | ATC | ATG | AAC | AAT | CTG | TTC |
| Sn-Prt   | A   | Q   | Q   | K   | P   | K   | V   | S   | V   | E   | Q   | S   | R   | D   | I   | M   | N   | N   | L   | F   |
| Sl-DNA   | ATA | AAG | CAA | AAR | CCT | AAG | GTT | ACW | GCT | GAG | CAA | TCT | ATG | GAC | ATT | ATG | AAC | AAT | TTG | CTA |
| Sl-Prt   | I   | K   | Q   | K   | P   | K   | V   | T   | A   | E   | Q   | S   | M   | D   | I   | M   | N   | N   | L   | L   |
| Sh-DNA   | ATC | AAG | CAA | AAA | CCC | AAG | GTT | TCA | GCT | GAG | CAG | TCA | AAA | GAC | ATC | ATG | AAC | AAT | CTC | TTC |
| Sh-Prt   | I   | K   | Q   | K   | P   | K   | V   | S   | A   | E   | Q   | S   | K   | D   | I   | M   | N   | N   | L   | F   |

841 MDS 9 900

Ug1-DNA GAT GAC TTC GAT AAC AAA CCA ATT GAT GAA TTG GAG GAT ATA CAT ... .. ACA GCA CAT  
 Ug1-Prt **D** **D** **F** **D** **N** **K** **P** **I** **D** **E** **L** **E** **D** **I** **H** ... .. **T** **A** **H**  
 Ug2-DNA GAT GAC TTC GAT AAC AAA CCA ATT GAT GAA TTG GAG GAT ATA CAT ... .. ACA GCA CAT  
 Ug2-Prt **D** **D** **F** **D** **N** **K** **P** **I** **D** **E** **L** **E** **D** **I** **H** ... .. **T** **A** **H**  
 Hol-DNA AAC CAA CTC GAT AGC AGA GCG GCT GAT GAG YTA GAA GAA TTC AAT ... .. AGT GCC GCA  
 Hol-Prt **N** **Q** **L** **D** **S** **R** **A** **A** **D** **E** **L** **E** **E** **F** **N** ... .. **S** **A** **A**  
 UroL-DNA TAA GAG TTT GAT TAG AAA GAT GCT GAT GAG CTT GAA GAT ATA AAT ... .. GTT GCT AAA  
 UroL-Prt **Q** **E** **F** **D** **Q** **K** **D** **A** **D** **E** **L** **E** **D** **I** **N** ... .. **V** **A** **K**  
 Pw-DNA CAA GAG TTA GAT AAC AAG GAC GCT GAT GAA CTT GAG GAT ATC AAT ... .. GCG GGY GCA  
 Pw-Prt **Q** **E** **L** **D** **N** **K** **D** **A** **D** **E** **L** **E** **D** **I** **N** ... .. **A** **G** **A**  
 Sn-DNA CAG CAA CTA GAT GCA AAA GAT GTA GAT GAA CTT GAA GAT GTC AAT GAA GCC AAA AAC ATG  
 Sn-Prt **Q** **Q** **L** **D** **A** **K** **D** **V** **D** **E** **L** **E** **D** **V** **N** **E** **A** **K** **N** **M**  
 Sl-DNA TAA GAA CTA GAT AAT AAA GAT GTY GAT GAG TTG GAR GAT GTA AAY ... .. GCA TCA GCA  
 Sl-Prt **Q** **E** **L** **D** **N** **K** **D** **V** **D** **E** **L** **E** **D** **V** **N** ... .. **A** **S** **A**  
 Sh-DNA TAA GAA CTT GAT TCA AAG GAT GTA GAT GAA CTC TAA GAT GTA AAC ... .. AAT TCA GCA  
 Sh-Prt **Q** **E** **L** **D** **S** **K** **D** **V** **D** **E** **L** **Q** **D** **V** **N** ... .. **N** **S** **A**

901 960

Ug1-DNA TAA GCT TTA AAT GTT GAT GAT TCA AAT TTC GCC CTT TCA AAA GAG TAG TAG ATG ATG AAC  
 Ug1-Prt **Q** **A** **L** **N** **V** **D** **D** **S** **N** **F** **A** **L** **S** **K** **E** **Q** **Q** **M** **M** **N**  
 Ug2-DNA TAA GCC TTA AAT GTT GAT GAT TCA AAT TTC GCC CTT TCA AAA GAG TAG TAG ATG ATG AAC  
 Ug2-Prt **Q** **A** **L** **N** **V** **D** **D** **S** **N** **F** **A** **L** **S** **K** **E** **Q** **Q** **M** **M** **N**  
 Hol-DNA ATT TTA GCA GAC WTG ... AAT AAG CCA ATG GCC TTT AGC AAA GAA GAG CAA CTC CTT AAC  
 Hol-Prt **I** **L** **A** **D** **ML** ... **N** **K** **P** **M** **A** **F** **S** **K** **E** **E** **Q** **Q** **L** **L** **N**  
 UroL-DNA GTT ATG GCA GAT CTC ... AAC CAA CCT ATT GCT TTT AGC AAA GAA GAA GAA TTA ATA AAC  
 UroL-Prt **V** **M** **A** **D** **L** ... **N** **Q** **P** **I** **A** **F** **S** **K** **E** **E** **E** **L** **I** **N**  
 Pw-DNA GTA ATC GCA GAA TTA ... AAC AAA CCA ATC GCA TTC AAT AAA GAG GAA CAA CTT TAT AGY  
 Pw-Prt **V** **I** **A** **E** **L** ... **N** **K** **P** **I** **A** **F** **N** **K** **E** **E** **Q** **L** **Y** **S**  
 Sn-DNA TTC GTT CAA GAA ATG ... AAC AGA CCA GTT GCC TTC AAC AAA GAG GAA GAT TTC AAT AAC  
 Sn-Prt **F** **V** **F** **E** **M** ... **N** **R** **P** **V** **A** **F** **N** **K** **E** **E** **G** **F** **N** **N**  
 Sl-DNA GTT ATG GCT GAG CTT ... AAC AAA CCA ATA GCC TTT ARC AAA AAT GAA GAA CTT TTG AAC  
 Sl-Prt **V** **M** **A** **E** **L** ... **N** **K** **P** **I** **A** **F** **NS** **K** **N** **E** **E** **L** **L** **N**  
 Sh-DNA GTT GTT ACC GAG CTA ... AAC AAA CCA ATT GCT TTC AAT TAG AAC GAT ATG CTG ACC TCG  
 Sh-Prt **V** **V** **T** **E** **L** ... **N** **K** **P** **I** **A** **F** **N** **Q** **N** **D** **M** **T** **T** **S**

961 MDS 4 MDS 10 MDS 11 1020

Ug1-DNA AAA TAC AAT GTC ATT ATT ... .. CAA Cct taA GCT ACA ACT aat atA GTT GTT CAA  
 Ug1-Prt **K** **Y** **N** **V** **I** **I** ... .. **Q** **P** **Q** **A** **T** **T** **N** **I** **V** **V** **Q**  
 Ug2-DNA AAA TAC AAT GTC ATT ATT ... .. CCA Cct taA GCT ACA ACT aat atA GTT GTT CAa  
 Ug2-Prt **K** **Y** **N** **V** **I** **I** ... .. **P** **P** **Q** **A** **T** **T** **N** **I** **V** **V** **Q**  
 Hol-DNA AAR TAY AAT GTC ACA CTG GGS AAC TCT GCT TCC AAG ACT ATA TAG CAG CAA CAA CCT GTG  
 Hol-Prt **K** **Y** **N** **V** **T** **L** **G** **N** **S** **A** **S** **K** **T** **I** **Q** **Q** **Q** **Q** **P** **V**  
 UroL-DNA AAG TAC AAC TTT ACT TTG GAA GCA AGG CAA ATT GCA GAT GAA AAA AGA ATG GGC GAA CAA  
 UroL-Prt **K** **Y** **N** **F** **T** **L** **E** **A** **R** **Q** **I** **A** **D** **E** **K** **R** **M** **G** **E** **Q**  
 Pw-DNA AAA TAT AAC TTA ACa tta GAA ACA AAG CAA GAA GTT ATG AAG TAG CAA ATA ATT GAA TAG  
 Pw-Prt **K** **Y** **N** **L** **T** **L** **E** **T** **K** **Q** **E** **V** **M** **K** **Q** **Q** **I** **I** **E** **Q**  
 Sn-DNA AGA TAC TCG GTC ACT TTA GAG TCA AGA GAA GAG CAA GAG CGC CGT CGT CAG AGC GAG CAA  
 Sn-Prt **R** **Y** **S** **V** **T** **L** **E** **S** **R** **E** **E** **Q** **E** **R** **R** **R** **Q** **S** **E** **Q**  
 Sl-DNA AAA TAC GGA GTA ACT TTA GAG TCW AAG CAA GAA ATT TAA GTG AAA AGA CAA CTT GAA TAG  
 Sl-Prt **K** **Y** **G** **V** **T** **L** **E** **S** **K** **Q** **E** **I** **Q** **V** **K** **R** **Q** **L** **E** **Q**  
 Sh-DNA AAA TAT GCA GTT ACA CTT GAA ACT CGC TAA GAA GTT GAA TAG AAG AGG GTC ACA GAG CAA  
 Sh-Prt **K** **Y** **A** **V** **T** **L** **E** **T** **R** **Q** **E** **V** **E** **Q** **K** **R** **V** **T** **E** **Q**



1201 MDS 13 4 1260

Ug1-DNA GCT TTA GAT Cat tcA GTT GTT CAA TAA ATT GAT CAA ... ..  
 Ug1-Prt A L D H S V V Q Q I D Q ... ..  
 Ug2-DNA GCT TTA GAT Cat tcA GTT GTT CAA TAA ATT GAT CAA ... ..  
 Ug2-Prt A L D H S V V Q Q I D Q ... ..  
 Hol-DNA GCA AAG AGT ... CAA ttg aat TAA TCC GCA GAT GAG TTC TAG TCA GCA TAT GAT GAA TCA  
 Hol-Prt A K S ... Q L N Q S A D E F Q S A Y D E S  
 UroL-DNA GCA AAA AGT AAT TAA TCA CAA ATT TAA TCA GAT GAT TAC CAG TCT GCT TTT GAT GAT TCA  
 UroL-Prt A K S N Q S Q I Q S D D Y Q S A F D D S  
 Pw-DNA GCC CAA AGT AAT CAA TCC TTG AAT CAG TCC TCA AAY TTT YAA TCT GCT TTT GAT GAC TCA  
 Pw-Prt A Q C N Q S L N Q S S S N F Q S A F D D S  
 Sn-DNA ATG GCG AAT CAT GCA GAT GGT GTT GAC CTT ... .. AAT CTC CTT GCT ATT GAC GAC ACT  
 Sn-Prt M A N H A D G V D L ... .. N L L A I D D T  
 Sl-DNA GCT AAA AGT TAG CTA TCT CAT GAC TAA TCT ATG GAA TAT CAA TCA GCT GTT GAT GAT TCT  
 Sl-Prt A K S Q L S H F Q S M E Y Q S A V D D S  
 Sh-DNA GTA GCG AAT CCT TAA ATT AAA GTG ACT TCT ... .. AAA CTC GCT CGT ATG GAT GAC TCA  
 Sh-Prt V A N P Q I K V T S ... .. K L A R M D D S

1261 1320

Ug1-DNA ... ..  
 Ug1-Prt ... ..  
 Ug2-DNA ... ..  
 Ug2-Prt ... ..  
 Hol-DNA AGA ATG GTT GAT ... ..  
 Hol-Prt R M V D ... ..  
 UroL-DNA AAG ATG CTT GAA TCT AAA TAA ATA GAA CAG CAA GTT CAA TAG ACT GTT AAA CCA TAA ATT  
 UroL-Prt K M L E S K Q I E Q Q V Q Q T V K F Q I  
 Pw-DNA AAA ATG CTA ATA GAT AGC AAG CCA ATT RTC CAR GAG AAT GAT CAT TAA GAA YCT TAA ...  
 Pw-Prt K M L I D S K P I IV Q E N D H Q E SP Q ...  
 Sn-DNA AAG ATG ACA GAT AGT CAC CCT AGC GAG ATT ATA ACC TAA AAT TAA AGA GCA AGT GCT GTT  
 Sn-Prt K M T D S H P S G I T T N Q R A S A V  
 Sl-DNA AAG ATG TCA GAA AGT AGC TCA GCA CAG ... .. AAA AAT GCA ... ..  
 Sl-Prt K M S E S S S A Q ... .. K N A ... ..  
 Sh-DNA ATG AAA ATT GAC TAG ACA TCT GCT TAG ... .. AAA AAT CAA ... ..  
 Sh-Prt M K I D Q T S A Q ... .. K N Q ... ..

1321 MDS 4 MDS 3 1380

Ug1-DNA ... .. GGT GAA TAA GAA AAG ATG GCT ata  
 Ug1-Prt ... .. V E Q E K M A I  
 Ug2-DNA ... .. GGT GAA TAA GAA AAG ATG GCT ata  
 Ug2-Prt ... .. V E Q E K M A I  
 Hol-DNA ... .. GAA CAA CAA GTA GAA CCG ATG TAG ATT GAG AAA CAG CAA TCA CCT AAG  
 Hol-Prt ... .. E Q Q V E P M Q I E K Q Q S P K  
 UroL-DNA CCA CCT ACT TCA AAT AGT ACT ACT CCA TTG ... ..  
 UroL-Prt P P T S N S T P L ... ..  
 Pw-DNA ... .. CTT ATT AAT CAA AAT CTT AAC ATG ... .. aag cag  
 Pw-Prt ... .. L I N Q N L N M ... .. K Q  
 Sn-DNA AGC TCA GTT AAC CAA TAG ATA ATG gag tCT ACC AAT GGA AAA AAC CAG CTC GAG AAA AAC  
 Sn-Prt S S V N Q Q I M E S T N G K N Q L E K N  
 Sl-DNA ... ATG AAT GAA GGT CCT ATA GCA TTC AGT AAA AAT TAA ACT AAT ATG TCT GCA tct aag  
 Sl-Prt ... M N E G P I F S K N T N M S A S K  
 Sh-DNA ... .. ATT GAa taA ACA GTG AAC CAC AGC AAG CTT TAG ... .. AGA TAT AAT CAA  
 Sh-Prt ... .. I E Q T V N H S K L Q ... .. R Y N Q

1381 **MDS 14** MDS 3 5 4 3 5 **MDS 6 5 4 6** 1440

Ug1-DNA GAT GAG GAA TGG TAA CTC ATT AAG GAA TAA AAT ... .. GAA TAA ATG AAG GTA ATG  
Ug1-Prt **D** **E** **E** **W** **Q** **L** **I** **K** **E** **Q** **N** ... .. **E** **Q** **M** **K** **V** **M**  
Ug2-DNA GAT GAG GAA TGG TAA CTC ATT AAG GAA TAA AAC ... .. GAA TAA ATG AAA GTA ATG  
Ug2-Prt **D** **E** **E** **W** **Q** **L** **I** **K** **E** **Q** **N** ... .. **E** **Q** **M** **K** **V** **M**  
Hol-DNA GAG GAT GAT TGG CAA AAG ATC AAA CAG CAA TAA ATB AAC AAC TAA GAA TCG GTT AAG ...  
Hol-Prt **E** **D** **D** **W** **Q** **K** **I** **K** **Q** **Q** **Q** **IM** **N** **N** **Q** **E** **S** **V** **K** ...  
UroL-DNA aat gat GAT TGG AAT CAA TTG AAA TAG CAA AAC TTT TAA ATG AAT AAC GAG TTT AAG CAC  
UroL-Prt **N** **D** **C** **W** **N** **Q** **L** **K** **Q** **Q** **N** **F** **Q** **M** **N** **N** **E** **F** **K** **H**  
Pw-DNA AAT GAT GAA TGG AAC TAG TTA aag caa caG AAT TCA ... GCT CAT AAC gat tat aac TAA  
Pw-Prt **N** **D** **C** **W** **N** **Q** **L** **K** **Q** **Q** **N** **S** ... **A** **H** **N** **C** **Y** **N** **Q**  
Sn-DNA GAT ACC gaa tgg caa taG ATG AAG GAG aag aat gcT GTT TTT AAT CAG GAC Tta aga atG  
Sn-Prt **D** **T** **E** **W** **Q** **M** **K** **E** **K** **N** **A** **V** **F** **N** **Q** **D** **L** **R** **M**  
Sl-DNA aat gat gaA TGG GCT TAA ATC AAA CAT CAG AAC Taa taa gcT CAT TAA GAG TTC aaa act  
Sl-Prt **N** **D** **E** **W** **A** **Q** **I** **K** **H** **Q** **N** **Q** **Q** **A** **H** **Q** **E** **F** **K** **T**  
Sh-DNA AAT CAA atg atg agt gga atC AAG TTA GAC aac aga acT TCT AAG CCA ATT AGG AAC TTA  
Sh-Prt **N** **Q** **M** **M** **S** **G** **I** **K** **L** **D** **N** **R** **T** **S** **K** **P** **I** **R** **N** **L**

1441 **MDS 7 6 5 7** **8** **9** **6** 1500

Ug1-DNA ACA ... .. GCT GCA TCA AGC GAA TCA GTA GAT TCC TAT CCA CTC CCC gta aAT AAG GAT  
Ug1-Prt **T** ... .. **A** **A** **S** **S** **E** **S** **V** **D** **S** **Y** **P** **L** **P** **V** **N** **K** **D**  
Ug2-DNA ACA ... .. GCT GCA TCA AGT GAA TCA GTA GAT TCC TAT CCA CTC CCC gta aAT AAG GAT  
Ug2-Prt **T** ... .. **A** **A** **S** **S** **E** **S** **V** **D** **S** **Y** **P** **L** **P** **V** **N** **K** **D**  
Hol-DNA ATT GAT TCT AAT GCT GCT CTT ... AAC TAA TAT GAT TAT CCT TTA CCT TTT AAC CCT GAT  
Hol-Prt **I** **D** **S** **N** **A** **A** **L** ... **N** **Q** **Y** **D** **Y** **P** **L** **P** **F** **N** **P** **D**  
UroL-DNA ATT GAC TCT AGC GCT GCT ATT ... AAT GCT TAA GAT TAT CCA GTT CCT TAT AAT GCT GAT  
UroL-Prt **I** **D** **S** **S** **A** **A** **I** ... **N** **A** **Q** **D** **Y** **P** **V** **P** **Y** **N** **A** **D**  
Pw-DNA ATT GAT CCA AAT GCT GCT CTA AAA ... GCA TAA GAC TAT CCA TTA CCT TTA AAT CAA GAC  
Pw-Prt **I** **D** **P** **N** **A** **A** **L** **K** ... **A** **Q** **D** **Y** **P** **L** **P** **L** **N** **Q** **D**  
Sn-DNA AAC GAT ... AAT GCA TTA ATG TCT AAT TAA CAA GAC TAT CCT CTT CCT TTG AAT GAA GAT  
Sn-Prt **N** **D** ... **N** **A** **L** **M** **S** **N** **Q** **Q** **G** **Y** **P** **L** **P** **L** **N** **E** **D**  
Sl-DNA atG GAG ... TAA AAA TCA GCT ATG GAT ATT TAA GAA TTT GCT CTC CCG TTA AAT CAA GAT  
Sl-Prt **M** **E** ... **Q** **K** **S** **A** **M** **D** **I** **Q** **E** **F** **A** **L** **P** **L** **N** **Q** **D**  
Sh-DNA gaa ata tgG AAC CAA GTG TTG GCC AAC ACT CAA GAA TTT CCA CTT CCT CTA AAC GAA AAT  
Sh-Prt **E** **I** **W** **N** **Q** **V** **L** **A** **N** **T** **Q** **E** **F** **P** **L** **P** **L** **N** **E** **N**

1501 **MDS 15 7** **MDS 5 4 8 7 8 10** 1560

Ug1-DNA AAA GAA CTA GCC TTC TTT TGG TTT GAT GCG CAT GAG GAA AAT ATG GGC TTG GAT GTT TTC  
Ug1-Prt **K** **E** **L** **A** **F** **F** **W** **F** **D** **A** **H** **E** **E** **N** **M** **G** **L** **D** **V** **F**  
Ug2-DNA AAG GAA CTA GCC TTC TTT TGG TTT GAT GCG CAT GAG GAA AAT ATG GGC TTG GAT GTT TTC  
Ug2-Prt **K** **E** **L** **A** **F** **F** **W** **F** **D** **A** **H** **E** **E** **N** **M** **G** **L** **D** **V** **F**  
Hol-DNA GGA TCA Cta tca ttc taT TGG ATA GAT GCT CAT GAA GAA AAT AAT GGA CAG GAC ATC TAT  
Hol-Prt **G** **S** **L** **S** **F** **Y** **W** **I** **D** **A** **H** **E** **E** **N** **N** **G** **Q** **D** **I** **Y**  
UroL-DNA GGT ACG Ctt tcc ttc tat tGG ATT GAT GCT CAT GAA GAG aat aat GGA GCT GAT TTA TAT  
UroL-Prt **G** **T** **L** **S** **F** **Y** **W** **I** **D** **A** **H** **E** **E** **N** **N** **G** **A** **D** **L** **Y**  
Pw-DNA GGT ACa tta tct ttC TAC TGG ATA GAT GCT CAT GAA Gaa aat aat GGA GCT GAT CTG TAC  
Pw-Prt **G** **T** **L** **S** **F** **Y** **W** **I** **D** **A** **H** **E** **E** **N** **N** **G** **A** **D** **L** **Y**  
Sn-DNA GGA act ctt tct ttC TAT TGG ATA GAT GCT Cat gaa gaa aat aac gGA GCT GAC TTG TTT  
Sn-Prt **G** **T** **L** **S** **F** **Y** **W** **I** **D** **A** **H** **E** **E** **N** **N** **G** **A** **D** **L** **Y**  
Sl-DNA GGC TCA TTA TCA TTC TAC tgg att gat gCA CAT GGG GAa aat aat gGC GCT GAT TTA TTC  
Sl-Prt **G** **S** **L** **S** **F** **Y** **W** **I** **D** **A** **H** **E** **E** **N** **N** **G** **A** **D** **L** **Y**  
Sh-DNA GGT ACA tta tca ttC TAT TGG ATC GAT GCT CAT GAA Gaa aat aat GGA ACA GAT CTG TAT  
Sh-Prt **G** **T** **L** **S** **F** **Y** **W** **I** **D** **A** **H** **E** **E** **N** **N** **G** **T** **D** **L** **Y**



1561 MDS 5 9 8 9 11 MDS 6 10 9 10 12 1620

Ug1-DNA CTT TTT GGC AAA GTT TAT CAG CCT GAA CTT AAG CAA TAT GTT TCT TGT TCA CTG AAa gta  
Ug1-Prt L F G K V Y Q P E L K Q Y V S C S L K V  
Ug2-DNA CTT TTT GGA AAA GTT TAT CAG CCT GAA CTT AAA CAA TAT GTT TCT TGT TCA CTA AAa gta  
Ug2-Prt L F G K V Y Q P E L K Q Y V S C S L K V  
Hol-DNA ATA TTC GGT AAG ATA TAT CAA CCA GAA GTC AAA AGT TTC GTT TCA TGC GCT CTT AAG GTT  
Hol-Prt I F G K I Y Q P E V K S F V S C A A L K V  
UroL-DNA GTC TTT GGT AAG ATT TTC TAA CCT GAA GTA AAG TAA TTC Gta tct tgt GCT TTG AAA GTA  
UroL-Prt V F G K I Y Q P E V K Q F V S C A A L K V  
Pw-DNA ATA TTT GGT AAA ATC TAT TAA CCA GAA GTA AAG Caa tat gtc tct TGC TCA CTT AAA GTT  
Pw-Prt I F G K I Y Q P E V K Q Y V S C S L K V  
Sn-DNA GTC TTT GGT AAA ATA TAT CAG CAT GAA GAG AGG AAG TTT GTA TCT tgc tct ATC AAA GTG  
Sn-Prt V F G K I Y Q H E E R K F V S C S I K V  
Sl-DNA ATA TTC GGA AAA ATC TAT CAA CCA GAG ATc aat taa taC GTA TCC TGC TCA ATG Aaa gta  
Sl-Prt I F G K I Y Q P E I N Q Y V S C A S M K V  
Sh-DNA ATT TTT GGG AAA ATT TAT CAA CCA CAA ATG AGA TAA TTC gtt tct tgc TCA ATG AAA GTT  
Sh-Prt I F G K I Y Q P Q M R Q F V S C S M K V

1621 MDS 16 MDS 11 13 11 10 MDS 12 14 12 1680

Ug1-DNA AAT GGC ATG TAG CGT ATT GTT TAT GCC TTG CCT AAG GTT TCT AAA AAC AAA TCT AGA GCA  
Ug1-Prt N G M Q R I V Y A L P K V S K N K S R A  
Ug2-DNA AAT GGC ATG TAA CGT ATT GTT TAT GCC TTG CCT AAG GTT TCT AAA AAC AAA TCT AGA GCA  
Ug2-Prt N G M Q R I V Y A L P K V S K N K S R A  
Hol-DNA AAT GGA ATG CAA AGA GAG ATG TAC GCA CTT CCT AAG ATA AAG AAC AAG GCA AGG TCA GCA  
Hol-Prt N G M Q R E M Y A L P K I K N K A R S A  
UroL-DNA AAT GGA ATG TAG AGA GAA ATT TAT GCT TTA CCT AAA TAA ACA ... GGC AAA GCT AGA Ggt  
UroL-Prt N G M Q R E I Y A L P K Q T ... G K A R G  
Pw-DNA AAT GGA ATG TAA AGa gaa ata taT GCT CTA CCC aaa atg aaa ... gGG AAA GCT AGA GGA  
Pw-Prt N G M Q R E I Y A L P K M K ... G K A R G  
Sn-DNA AAT GGT ATG CAA AGa gag cta ttT GTT CTT CCT AAG ATG AGT ... GGT AAA TCT AGA GCA  
Sn-Prt N G M Q R E L F V L P K M S ... G K A R A  
Sl-DNA aat GGA ATG TAA AGA GAG ATA TAT GCG CTT Cct aaa atG CAA AAG GGT AAA Gct aga gGA  
Sl-Prt N G M Q R E I Y A L P K M Q K G K A R G  
Sh-DNA AAT GGA atg caa aGA GAA CTC TAT GCT CTC Cct aaa atg aGA ... GGT AAA GCA aga gga  
Sh-Prt N G M Q R E L Y A L P K M R ... G K A R G

1681 MDS 7 13 13 15 MDS 8 14 11 14 16 1740

Ug1-DNA GAA TTG ACG AAG GAA GAG GAG TAG GAA ATG GCA TTA AAA ATC TTC TCA GAG TTG GAT GGT  
Ug1-Prt E L T K E E E Q E M A L K I F S E L D G  
Ug2-DNA GAA TTA ACC AAA GAA GAG GAG TAG GAA ATG GCA TTA AAA ATC TTC TCA GAG TTA GAT GGT  
Ug2-Prt E L T K E E E Q E M A L K I F S E L D G  
Hol-DNA CTT AGT AAA GAG GAA GAA GAC AAG CAA GTC ATG AAT ... ATA TTC CAT GAA CTT GAC GAT  
Hol-Prt L S K E E E E K Q V M N ... I F H E L D D  
UroL-DNA aCC TTA ACT AAG GAG GAA GAA TCA aaa taa gTT AGA GCT GTT TAA TTA GAA CTT GAT GAT  
UroL-Prt T L T K E E E S K Q V R A V Q L E L D D  
Pw-DNA act ctt aCT AAA GAG GAG GAA TCa taa taa gtt aGA AGT GTT TAA TTA GAA CTA GAT GAT  
Pw-Prt T L T K E E E S Q Q V R S V Q L E L D D  
Sn-DNA GCA ATG ACA ACT GAA GAA GAG Aaa gaa tag gca aGA AAA GTG ATG ATG GAA CTT GAA GGA  
Sn-Prt A M T T E E E K E Q A R K V M M E L E G  
Sl-DNA ACT TTG ACA AGA GAA GAG Gaa aat caa CTA GTT AGA GGT GTA CAA CTA GAA CTA GAA GAT  
Sl-Prt T L T R E E E N Q L V R G V Q L E L E D D  
Sh-DNA gCT TTG ACT GTT GAA GAA GAG AAA TAA TAA GTA AGA GCT Gta atg atg gAG TTA GAT GAT  
Sh-Prt A L T V E E E K Q Q V R A V M M E L D D

1741 MDS 17 1800

Ug1-DNA ATC AGA AAG AAT AAA TTC CCA TCC ATC TCA taa tGG AAG TGC AAA GTA GCT AAG AGA AAG  
 Ug1-Prt I R K N K F P S I S Q W K C K V A K R K  
 Ug2-DNA ATC AGA AAA AAT AAA TTC CCA TCA ATC TCA taa tGG AAG TGC AAA GTA GCT AAG AGA AAG  
 Ug2-Prt I R K N K F P S I S Q W K C K V A K R K  
 Hol-DNA ATC AGR AAA AAG CGA TTC ACA CAA ATC ACT AAA TGG AAA TGC AAG CCT GTC ATG AGA AAG  
 Hol-Prt I R K K R F T Q I T K W K C K P V Y M R K  
 UroL-DNA ATT AGA AAG AAA AGA TTC TCA GGA ATC ACA AAA TGG AGA TGC AAG CCA GTT ACT AGA AAG  
 UroL-Prt I R K K R F S G I T K W R C K P V T R K  
 Pw-DNA ATT AGA AAG AAG AGA TTC GCG AAT ATA ACA AAA TGG AGA TGC AAG CCA GTT ACT AAG AAA  
 Pw-Prt I R K K R F A N I T K W R C K P V T R K  
 Sn-DNA GTT AGA ... AAG AGA TTC CCA GCT ATC ACT AAG TGG AGA TGT AAG CCT GTC ACT AGA AAG  
 Sn-Prt V R ... K R F P A I T K W R C K P V T R K  
 Sl-DNA ATT AGA AAG AAA AGA TTC CAG GGT ATT ACT AAA TGG AGA TGC AAG CCA GTT ACC AGG AAA  
 Sl-Prt I R K K R F Q G I T K W R C K P V T R K  
 Sh-DNA ATT AGA AAG AAG AGA TTC CCT CAA ATT TCA AAA TGG AGA TGC AAG CCA GTT AAT AGA AAG  
 Sh-Prt I R K K R F P Q I S K W R C K P V N R K

1801 MDS 9 15 12 15 17 1860

Ug1-DNA TAT GCA TTT GAA ATG CCA ATT CAT CAC GGT GAG CAT TAA TTG CTT AAG ATC AAA TAT GAC  
 Ug1-Prt Y A F E M P I H H G E H Q L L K I K Y D  
 Ug2-DNA TAT GCA TTT GAA ATG CCG ATA CAT CAT GGT GAG CAT TAA TTG CTT AAG ATC AAA TAT GAC  
 Ug2-Prt Y A F E M P I H H G E H Q L L K I K Y D  
 Hol-DNA TAC GCA TTT GAA ATG CCA ATT CAA CAT GGA GAG CAT AAG TTC CTT AAA GTC AAG TAT GAC  
 Hol-Prt Y A F E M P I Q H I G E H K F L L K V K Y D  
 UroL-DNA TAT GCT TTT GAG Atg cca ata CAG CAT GGT GAA CAT CTT TTC TTG aaa att aaG TAT GAT  
 UroL-Prt Y A F E M P I Q H I G E H L F L L K I K Y D  
 Pw-DNA TAT GCA TTT GAA ATG CCA ATC tag cat GGA GAG CAT TTA TTC TTA AAA ATG aag tat GAT  
 Pw-Prt Y A F E M P I Q H I G E H L F L L K M K Y D  
 Sn-DNA TAT GCG ttt gag ctg CCT ATT TAG CAT GGA GAA CAT CAA TTT Gtt aag atc aAA TAC GAT  
 Sn-Prt Y A F E L P I Q H I G E H F T V K I K Y D  
 Sl-DNA TAT GCA TTC GAA ATG CTT ATT CAA Cat gga gag CAT TTG TTC ttg aaa atc aaG TAT GAT  
 Sl-Prt Y A F E M L I Q H I G E H L F L L K I K Y D  
 Sh-DNA TAC GCT TTT GAA ATG CCA ATT CAA Cat ggt gag CAT TAA TTC TTG aaa atc aaG TAT GAT  
 Sh-Prt Y A F E M P I Q H I G E H Q F L L K I K Y D

1861 MDS 10 16 13 16 18 MDS 17 MDS 18 1920

Ug1-DNA TCG ACA ATG CCA CCA CTC CCT GCC AAT CTA ACA GGA TCC ACC TTT GAA TGT CTC TTC AAT  
 Ug1-Prt S T M P P L P A N L T G S T F E C L F N  
 Ug2-DNA TCA ACG ATG CCA CCA CTC CCT GCC AAT CTA ACA GGA TCC ACC TTT GAA TGT CTC TTC AAT  
 Ug2-Prt S T M P P L P A N L T G S T F E C L F N  
 Hol-DNA TGC ACT ATG CCA TCM CTC CCA CCT GGA CTT ACT GGA AAC ACA TTC GAG TGT GTT TTT GGT  
 Hol-Prt C T M P S L P P G L T G N T F E C V F G  
 UroL-DNA AGC ACA ATG CCT CCA CTA CAT AAT CTA ACA GGA TAA TCa ttt gaa tgc TTG TTT AAC  
 UroL-Prt S T M P L P P T N L T G Q S F E C L F N  
 Pw-DNA TCA ACA ATG CCA TCA CTC CCT AGT AAT TTA ACA GGA aac aCT TTT Gaa tgc tTA TTT GGA  
 Pw-Prt S T M P S L P S N L T G N T F E C L F G  
 Sn-DNA GCA ACC TTC CCT TCT CTT CCT AGC ACA GTA CAG GGT AAT ACA TTT GAA TGC ATT TTC Gga  
 Sn-Prt A T F P S L P S T V Q G N T F E C I F G  
 Sl-DNA GCA ACA TTT ATC CCT CTA CCA AGT ACT GTT TAA GGA AAT ACA TTT GAA TGC TTA TTT GGC  
 Sl-Prt A T F I P L P S T V Q G N T F E C L F G  
 Sh-DNA AGC ACC ATG CCT CCA CTA CCA AGC ACA ATT TAA GGA AAC ACA TTC GAA TGT ATT TTT GGG  
 Sh-Prt S T M P P L P S T I Q G N T F E C I F G

1921 MDS 11 19 14 17 19 MDS 18 1980

Ug1-DNA ACT CAA TAA TCT ATG CTA GAG TTG CTT CTC ttg AAA TAG AAG ATA AAA GGT CCT TGC TGG  
Ug1-Prt T Q Q S M L E L L L L K Q K I K G P C W  
Ug2-DNA ACT TAA TAA TCT ATG CTA GAG TTG CTT CTC ttg AAA TAG AAG ATA AAA GGA CCT TGC TGG  
Ug2-Prt T Q Q S M L E L L L L K Q K I K G P C W  
Hol-DNA GCY AAT CAA AGC ATG CTT GAG TTA CTT ATT CTC AAG AGA AAG ATH AAG GGT CCA TGY TGG  
Hol-Prt A N Q S M L E L L I L K R K I K G P C W  
UroL-DNA ACT AAT TAA AGC ATG CTT GAA CTT TTA ATT CTA AAA AGA AAG ATT AAA GGT CCA TGC TGG  
UroL-Prt T N Q S M L E L L I L K R K I K G P C W  
Pw-DNA GCa aac taa agc ATG TTA GAG TTA TTY ATT ATC AAA AGA AAG ATA AAG GGT CCT TGY TGG  
Pw-Prt A N Q S M L E L F I I I K R K I K G P C W  
Sn-DNA gct aaT TAG AGT ATG CTC GAG TCT TTC ATT CTC AAG AGA AAA ATC AGA GGT CCA TGC TGG  
Sn-Prt A N Q S M L E S F I L K R K I R G P C W  
Sl-DNA TCT AAC TAA AGC atg ctt gaa CTC TTC ATT CTT AAA AGG AAA ATT AAA GGT CCC TGC TGG  
Sl-Prt S N Q S M L E L F I L K R K I K G P C W  
Sh-DNA TCG ACT Taa agc atg ctt gAG TTA TTC ATT TTA AAG AGG AAA ATT AGA GGT CCA TGC TGG  
Sh-Prt S T Q S M L E L F I L K R K I R G P C W

1981 2040

Ug1-DNA ATA ACA TTG AAA AAT GTA TAA TAA ATT ACC TAG GCC TCT AAT AAG AGG TCC TGG TGT AAA  
Ug1-Prt I T L K N V Q Q I T Q A S N K R S W C K  
Ug2-DNA ATA ACA TTG AAA AAT GTA TAA TAA ATT ACC TAG GCC TCT AAT AAG AGA TCC TGG TGT AAA  
Ug2-Prt I T L K N V Q Q I T Q A S N K R S W C K  
Hol-DNA TTC ACA TTA AAG TCA CCT CAA AAA GTG ACA GAC TTT ... .. AAG AAG ACA TGG TGC AGA  
Hol-Prt F T L K S P Q K V T D F ... .. K K T W C R  
UroL-DNA ATG ACT ATT AAG AAC GCT CAA AAA GTA GTT GAT TTC ... .. AAG aag acc TGG TGT AGA  
UroL-Prt M T I K N A Q K V V D F ... .. K K T W C R  
Pw-DNA ATG ACT GTT AAG AAT CCA AAG AAA GTT ATT GAT TTT ... .. CCa aaa act tgG TGC AGA  
Pw-Prt M T V K N P K K V I D F ... .. P K T W C R  
Sn-DNA ATG ACT ATT AGA AAC CCT CAA AAG GTA ACT GAT TTC ... .. AGA AGG ACA tgg tgc aaA  
Sn-Prt M T R N Q K V T D F ... .. R R T W C K  
Sl-DNA ATG ACG ATA AAA AAT CCA AAG AAA GTT ACT GAC TTC ... .. aag aaa acA TGG TGT AGA  
Sl-Prt M T I K N P K K V T D F ... .. K K T W C R  
Sh-DNA ATG ACA ATC AAA AAC CCT ACA AAA GTT ACT gat ttc ... .. aag aaa acA TGG TGC AGA  
Sh-Prt M T I K N P T K V T D F ... .. K K T W C R

2041 MDS 12 20 15 18 20 2100

Ug1-DNA CAT GAT TTA GTT ATA TCC TCG CCT AAG GAT ATT GTG ATT ACA GTT GAT GAC TTG AAC AAG  
Ug1-Prt H D L V I S S P K D I V I T V D D L N K  
Ug2-DNA CAT GAC TTA GTT ATA TCC TCG CCG AAG GAT ATT GTG ATT ACA GTT GAT GAC TTG AAC AAG  
Ug2-Prt H D L V I S S P K D I V I T V D D L N K  
Hol-DNA CAA GAG ATA TTC ATT AAT GAT CCA AAG CAA ATC GAA GTG ACA CTT GAT GAT CTC AAT AGA  
Hol-Prt Q E I F I N D P K Q I E V T L D D L N R  
UroL-DNA TAA GAA ATT TCA ATA GAT AAT CCT AAG AAT ATT GAA ATT ACA CTT GAT GAC tta aac aga  
UroL-Prt Q E I S I D N P K N I E I T L D D L N R  
Pw-DNA TAA GAG ATA ACA GTT GAT GAT CCT AAA TTT GTT Gaa gtt act ctt GAT GAT CTT AAC AGA  
Pw-Prt Q E I T V D D P K F V E V T L D D L N R  
Sn-DNA TAG GAG ATT TTA GTA AGC AAT CCT AAA GAT ATA GAA ATC ACC CTT Gat gat ttg aaC AAA  
Sn-Prt Q E I L V S N P K D I E I T L D D L N K  
Sl-DNA TAA GAG ATT GAA ATT GAT AAT CCT AAA AAT GCA GAG GTT ACA TTG Gat gat ctt AAC AAA  
Sl-Prt Q E I T V D N P K N A E V T L D D L N K  
Sh-DNA CAG GGA ATT GTA ATT GAT AAC CCA AAG AAC GTA GAA gtt act ctt gAA GAT TTA AAT AAG  
Sh-Prt Q G I V I D N P K N V E V T L E D L N K

2101 MDS 13 21 16 19 21 MDS 19 2160

Ug1-DNA ... GAA AGT CCA CCA CTC ACA GCA Ctt tgC CTT GCT CTT AAG ACT TGC AGA TCT GCA CAA  
 Ug1-Prt ... E S P P L T A L c L L A L K T C R S A Q  
 Ug2-DNA ... GAA AGT CCA CCA CTC ACA GCA Ctt tgC CTG GCT CTT AAG ACT TGC AGA TCT GCA CAA  
 Ug2-Prt ... E S P P L T A L c L L A L K T C R S A Q  
 Hol-DNA ACC GAA ACC CCA CCA CTC AGY TCA TTC ACA TTC TCA TTC AAA ACA ACC AGA TCA CAA CAT  
 Hol-Prt T E T P P L S S F T F S F K T T R S Q H  
 UroL-DNA TAA GAA GTA CCA CCT TTG ACT TCT TTA TGC TTT TCA TTT AAA ACC ACT AGA TCT TAA AAT  
 UroL-Prt Q E V P P L T S L c F S F K T T R S Q N  
 Pw-DNA TAA GAT TTA CCT CCC TTA ACT TCA TTA AGT TTT TCA TTT AAA ACA ACA AGA TCT CAA AAT  
 Pw-Prt Q E L P P L T S L c F S F K T T R S Q N  
 Sn-DNA ACT GAG CTA CCT CCT TTG ACC TCT GTC ACA TTT GCC ATA aaa act tGT AGA TCA TCT TAA  
 Sn-Prt T E L P P L T S V T F A I K T C R S S Q  
 Sl-DNA ACT GAT ATC CCA CCA CTA ACC TCC TTA ACA TTC GCA TTC AAG ACT GCC AGA TCT CAG AAT  
 Sl-Prt T E T P P L T S L T F A F K T A R S Q N  
 Sh-DNA TAG GAA CTT CCA CCT CTC ACA TCT CTT ACT TTC TCA TTT AAA ACC ACC AGA gct caa taa  
 Sh-Prt Q E L P P L T S L T F S F K T T R A Q Q

2161 MDS 22 17 22 20 MDS 23 18 21 23 MDS 20 2220

Ug1-DNA AAT ACA AAT GAG ATT TCT ATG ATT TCA ATG CTA ATT CAT AAC Aat ata aat TAG GAT GGT  
 Ug1-Prt N T N E I S M I S M L I H N N I N Q D G  
 Ug2-DNA AAT ACA CAT GAG ATT TCT ATG ATT TCA ATG CTA ATT CAT AAC Aat ata aat TAG GAT GGT  
 Ug2-Prt N T H E I S M I S M L I H N N I N Q D G  
 Hol-DNA AAT ACC AAT GAA ATC GCW ATG ATC TCA TGC ATT ATT CAC TAG AAT GTA CAG CAA GAT GGA  
 Hol-Prt N T N E I A M I S c I I H Q N V Q Q D G  
 UroL-DNA AAC ACC AAT GAA ATA GCT ATG ATT TCT TGC TTG GTT CAT AAT AAT GTA AAC TAA GAT GGA  
 UroL-Prt N T N E I A M I S c L V H N N V N Q D G  
 Pw-DNA AAC aCG AAT GAA ATA Gct atg ata tca tGC TTG ATC CAT AAC AAT ATT AAC TAG GAA GGT  
 Pw-Prt N T N E I A M I S c L I H N N I N Q E G  
 Sn-DNA AAC ACT AAT gag ata gca atG CTC TCT TGC ATT GTT AAC GAA AAC ATC AGT TAA GAA GGT  
 Sn-Prt N T N E I A M I S c I I V N E N I S S E G  
 Sl-DNA AAC ACa aat gag ATT GCT ATG ATT TCT tgc ttg gtt CAT AAC AAT GTT AAT CAG GAA GGA  
 Sl-Prt N T N E I A M I S c L V H N N V N Q E G  
 Sh-DNA aaC ACC AAT GAA ATT GCT ATG ATa tca tgc TTG ATT AAT ACA AAC ATT GCT CAA GAA GGA  
 Sh-Prt N T N E I A M I S c L I N T N I A Q E G

2221 2280

Ug1-DNA GCT ACT AAT GAT AAA AGA ATG TAA TCT ATC ACT CTG ATT AGA AGA TTG AAT ACA GCA CCT  
 Ug1-Prt A T N D K R M Q S I T L I R R L N T A P  
 Ug2-DNA GCT ACT AAT GAT AAA AGA ATG TAA TCT ATC ACT CTG ATT AGA AGA TTG AAT ACA GCA CCT  
 Ug2-Prt A T N D K R M Q S I T L I R R L N T A P  
 Hol-DNA CCG ACC ACT CTT GAT AAG TTC TAA AGC TTC ACC CTC CTT AGA AAA CTT GAT GGT AAA CCC  
 Hol-Prt P T T T L D K F Q S F T L L R K L D G K P  
 UroL-DNA CTT ACT TAA GCA GAG AAA TTC TAA ACT TTG ACA CTC CTA AGA AAG TTA GAT Gga atg cct  
 UroL-Prt L T T Q A E K F Q T L T L R K L D G M P  
 Pw-DNA CTC ACT ACC CCA GAT AAA TTT TAG TCT TTC ACA TTA TTA AGA AAA TTA GAT GGA AAA CCT  
 Pw-Prt L T T P D K F Q S F T L L R K L D G K P  
 Sn-DNA CCT TCA AAA ATT GAT GTC CAC AAA TCA TTC ACT TTA CTC AGA AAA CTT Gat gga aag CCT  
 Sn-Prt P S K I D V H K S F T L L R K L D G K P  
 Sl-DNA CCA TCT TAG ACT GAC AAA TTT TAG ACA TTT ACT TTA GTC AGG AAG CTC gat ggc aaa CCA  
 Sl-Prt P S Q T D K F Q T T L R K L D G K P  
 Sh-DNA CCT TCT CAA GTT GAA AGA ACT CAA TCA TTC ACC TTA TTA AGa aaa ctt GAT GGT AAA CCT  
 Sh-Prt P S Q V E R T Q S F T L L R K L D G K P

2281 MDS 14 24 19 22 24 2340

Ug1-DNA TTA CCA AAA GAT TTC GAA GGA AGA GCA AAA TAG AAA AAG GAT TCT TCT ATT TTC ACA TTC  
Ug1-Prt L P K D F E G R A K Q K K D S S I F T A F  
Ug2-DNA TTA CCA AAA GAT TTC GAA GGA AGA GCA AAA TAG AAA AAG GAT TCT TCT ATT TTC ACA TTC  
Ug2-Prt L P K D F E G R A K Q K K D S S I F T A F  
Hol-DNA ATG CCC CAT GAC TTT GAA TAT AAA CTT AAA TCA AAG AGA GAT CTC TCG ... ... TAC TTC  
Hol-Prt M P H D F E Y K L K S K R D L S ... ... Y F  
UroL-DNA tta CCA TTT GAT TTC GAG AAA AGA TTA AAA CAA CGA TAG GAC AAC ... ATC TAA Gtc ttt  
UroL-Prt L P F D F E K R L K Q R Q D N ... I Q V F  
Pw-DNA TGG CCA ttt gat tTC GAG TAA AAG CTA AAG CAA AAG AAG GAT AGC ... ATT Taa tgg ttt  
Pw-Prt W P F D F E Q K L L Q K K D S S ... I Q W F  
Sn-DNA ATG CCA ATT GAA TAT GAG AGA GCT TTC AGA GAT AAG AAA GAT TCC TTC ATT TAG TTC TTC  
Sn-Prt M P I E Y E R A F R D K K D S F I Q F F  
Sl-DNA ATG CCA TTT GAT TTT GAC TAA AAG CTT AGA TAG AAG AAA GAg aat ... att taa taC TTC  
Sl-Prt M P F D F D Q K L R Q K K E N ... I Q Y F  
Sh-DNA ATG CCT TAT GAC TTT GAT TAA AAG GTC AAA CAA AGA AAG GAA AAT ATC ATT CAA AAG TTT  
Sh-Prt M P Y D F D Q K V K Q R K E N I I Q K F

2341 MDS 15 25 20 23 25 2400

Ug1-DNA TAA AAT GAA AAG GCA CTA TTA GAA AAT TTC ATT TCT CGT TTA CAT TTA ATT GAT CCT GAC  
Ug1-Prt Q N E K A L L E N F I S R L H L I D P D  
Ug2-DNA TAA AAT GAA AAG GCA CTA TTG GAA AAT TTC ATT TCA CGT TTA CAC TTA ATT GAT CCT GAC  
Ug2-Prt Q N E K A L L E N F I S R L H L I D P D  
Hol-DNA CCT AAT GAA AGA TAG ATG ATC GAT GCC TTT ATT AAT AAA CTT ACA ATT ACC GAC CCT GAT  
Hol-Prt P N R Q M I F I N K L T I T D P D  
UroL-DNA aCA AAT GAG AAA TAA ATG ATA GAG GCT TTT ATT TCT AGA ATG CAC TTA ATT GAT CCA GAT  
UroL-Prt T N E K Q M I E A F I S R M H L I D P D  
Pw-DNA taG AAT GAA AGA TAA ATG ATC GAA ATA TTT ATT TCA AAG ATT TTC CTA GTC GAT CCT GAT  
Pw-Prt Q N E R Q M I E I F I S K I F L V C P D  
Sn-DNA TAA CAT Gag aga caA CTT ATT GAA GCC TTC GTT GCT AAA ATA TAC CAG CTT GAT CCT GAT  
Sn-Prt Q H R Q L I E A F V A K I Y L L P D  
Sl-DNA ACT AAT GAA AGA TAA ATG ATA GAC TTA TTT GTA ACT AGA ATT TTC TAA ATT GAT CCA GAT  
Sl-Prt T N E R Q M I D L F V T R I F Q I D P D  
Sh-DNA GAA AAT gag aga tag aTG ATT GAA GCA TTT ATA GCT AAA GTG TTC ATT GTT GAT CCA GAC  
Sh-Prt E N E R Q M I E A F I A K V F I V C P D

2401 MDS 21 16 26 21 24 26 2460

Ug1-DNA ATG TTG ATA GCA Cat aat tta TGT GGA GGC ATT CTT GAA TTG CTC CTA GCA CGT ATT TAA  
Ug1-Prt M L I A H N L C G G I L E L L L A R I Q  
Ug2-DNA ATG TTG ATA GCA Cat aat tta TGT GGA GGC ATT CTT GAA TTG CTC CTA GCA CGT ATT CAA  
Ug2-Prt M L I A H N L C G G I L E L L L A R I Q  
Hol-DNA CTC CTA GTT GCT CAT AAT CTT TGT GGA GGT ATG TTC GAA CTA CTG CTT GCA AGA ATC CAG  
Hol-Prt L L V A H N L C G G M F E L L L A R I Q  
UroL-DNA CTT Ctt att gct CAT AAC CTT TGC GGA GGT ATG TTT GAT TTA CTA TTA GCA AGA ATT CAA  
UroL-Prt L L I A H N L C G G M F F D L L L L A R I Q  
Pw-DNA CTT GTT GTA GCA CAT AAC tta tGT GGT GGA ATG TTT GAT TTG CTA TTG TCA AGG ATA CAA  
Pw-Prt L V V A H N L C G G M F D L L L L S R I Q  
Sn-DNA CTC ATG Gtg gct cat aat CTC TGT GGA GGA ATG TTT GAT CTT CTT CTA GCA AGA ATA TAG  
Sn-Prt L M V A H N L C G G M F D L L L L A R I Q  
Sl-DNA CTT ATT gtg gct caC AAT CTA TGT GGG GGA ATA TTC GAT CTC TTA CTA GCT AGA ATT TAA  
Sl-Prt L I V A H N L C G G I F D L L L L A R I Q  
Sh-DNA CTT Gta gtt gct cAC AAT TTA TGT GGA GGA ATG TTT GAT TTG TTA TTA GCA AGA ATT CAA  
Sh-Prt L V V A H N L C G G M F D L L L L A R I Q

2461 2520

Ug1-DNA TGG CTA AAA CTA GCA CAT TGG TCA AGA TTG GGT CGC CTG AAG CGT CAA TAA ATT CCA ACA  
 Ug1-Prt W L K L A H W S R L G R L K R Q Q I P T  
 Ug2-DNA TGG CTA AAA CTA GCA CAT TGG TCA AGA TTG GGT CGC CTG AAG CGT TAA TAA ATT CCA ACA  
 Ug2-Prt W L K L A H W S R L G R L K R Q Q I P T  
 Hol-DNA TTC CTC AAG ATA AAC CAT TGG TCC CGT ATT GGT AGA ATG AAG AAA TCA AAT ATT CCC AGT  
 Hol-Prt F L K I N H W S R I G R M K K S N I P S  
 UroL-DNA TTG TTA AAG GTC AGT CAC TGG AGT AGA ATA GGA AGA TTC AAA AAA GCA AAC ATT CCa aat  
 UroL-Prt L L K V S H W S R I G R F K K A N I P N  
 Pw-DNA ATT TTA AGA ATA AAT CAT TGG AGT AGA ATT GGT AGA TTT AGA AGA GGA ACA att cca aat  
 Pw-Prt I L R I N H W S R I G R F R R G T I P N  
 Sn-DNA ATG CTC AAA ATT AGT CAC TGG TCC AGA ATT GGT CGC CTA AAG AAG AAC TAA ATT CCT aac  
 Sn-Prt M L K I S H W S R I G R L K K N Q I P N  
 Sl-DNA ATA CTT AAA ATT AAC CAC TGG AGC AGA ATT GGT AGA TTT AAG AAA GGA AAC ATT CCT ACT  
 Sl-Prt I L K I N H W S R I G R F K K G N I P T  
 Sh-DNA TAT TTG AAG GTT AAT CAC TGG TCT AGA ATT GGA AGA TTA AAG AAG ACT TAA ATC CCT AAC  
 Sh-Prt Y L K V N H W S R I G R L K K T Q I P N

2521 MDS 17 27 22 25 27 MDS 18 28 23 26 28 22 2580

Ug1-DNA AAG AAA TTC GAT TCT GTC ... .. TCA caa taa tGG GTG CCT CGT TTA  
 Ug1-Prt K K F D S V ... .. S Q Q W V P R L  
 Ug2-DNA AAG AAA TTC GAT TCT GTC ... .. TCA Caa taa tGG GTG CCT CGT TTA  
 Ug2-Prt K K F D S V ... .. S Q Q W V P R L  
 Hol-DNA AAG AAA TTC GAT CAA GGT GGC CCA TCA TAT GGT GGT TCC ... CAA TGG ATT CCT AGA TAA  
 Hol-Prt K K F D Q G G P S Y G G S ... Q W I I P R Q  
 UroL-DNA aaa aag ttt GAT ACA GGT GGG GCT AAT TAT GGA Ggt tca ... taG TGG ATT CCa aga taa  
 UroL-Prt K K F D T G G A N Y G G S ... Q W I I P R Q  
 Pw-DNA aAG AAA TTT GAT TAA GGT GGA GCT AGC TAT Gga gga tca ... tag tGG ATT CCa aga taA  
 Pw-Prt K K F D Q G G A S Y G G S ... Q W I I P R Q  
 Sn-DNA aag aaA TCA GAT CAA AGC GGA GCC aat tat gGA GGT TCT ... TAA TGG att cca aGA TAA  
 Sn-Prt K K S D Q G G A N Y G G S ... Q W I I P R Q  
 Sl-DNA AAG Aag ttt gaT ACT GGT GGT GCT AAT TAC GGA Gga tcc ... taA TGG ATT CCa aga taa  
 Sl-Prt K K F D T G G A N Y G G S ... Q W I I P R Q  
 Sh-DNA AAG aag cta gat ttt GGA GGT TCA AGC TAC gga gga tct ... CAA TGG ATT Cca aga taa  
 Sh-Prt K K L D F G G S S Y G G S ... Q W I I P R Q

2581 MDS 23 MDS 19 29 24 27 29 2640

Ug1-DNA GCA TCA TGT GGT CGC cta tTA GTT GAC ACG TTC CTA TCA GCC AAG GAG CTA ATT AGA GAG  
 Ug1-Prt A S C G R L L V D T F L S A K E L I R E  
 Ug2-DNA GCA TCA TGT GGT CGC cta tTA GTT GAC ACC TTC CTA TCA GCC AAG GAG CTA ATT AGA GAG  
 Ug2-Prt A S C G R L L V D T F L S A K E L I R E  
 Hol-DNA GTC ACC TGT GGT CGA CTC CTA GTT GAT ACT TTC CTC ACA GCC AAA GAA CTC ATC AGA GAA  
 Hol-Prt V T C G R L L V D T F L T A K E L I R E  
 UroL-DNA gta act TGT GGT AGA TTA TTA GTC GAT ACT TTC CTA ACA GCT AAG GAA TTA ATT AGA GAA  
 UroL-Prt V T C G R L L V D T F L T A K E L I R E  
 Pw-DNA GTG ACC TGT GGA AGA TTG CTA GTT GAT ACT TTC CTA TCA GCA AAA GAA CTT ATC AGA GAG  
 Pw-Prt V T C G R L L V D T F L S A K E L I R E  
 Sn-DNA GTT ACT TGT GGA AGA TTG TTA GTT GAT ACT TTC TTG ACT GCC AAA GAG CTT ATT AGA GAG  
 Sn-Prt V T C G R L L V D T F L T A K E L I R E  
 Sl-DNA GTT ACT TGT GGT AGA TTG TTA GTT GAT ACT TTC CTC TCT GCC AAG GAG CTG ATC AGA GAA  
 Sl-Prt V T C G R L L V D T F L S A K E L I R E  
 Sh-DNA GTC ACA TGT GGT AGA TTA CTT GTT GAT ACT TTC CTT TCT GCT AAG GAG CTT GTA AGA GAA  
 Sh-Prt V T C G R L L V D T F L S A K E L V R E

2641 MDS 25 28 30 2700

Ug1-DNA ACT AGC TAC GAT TTG AAG CAT TTG GCT GAT GTT TAG TTG AAG AAA GTG AGA GAG GAC TAT

Ug1-Prt T S Y D L K H L L G V Q L K K V R E D Y

Ug2-DNA ACT AGC TAC GAT TTG AAG CAT TTG GCT GAT GTT TAG TTG AAG AAA GTG AGA GAG GAC TAT

Ug2-Prt T S Y D L K H L L A D V Q L K K V R E D Y

Hol-DNA ACA AAC TAC GAT CTA TCA CAC TTA GCA AAG GTT CAA CTT AAA CAA ACC AGA CAA GAA TTT

Hol-Prt T N Y D L S H L A K V Q L K Q T R Q E F

UroL-DNA ACA AAC TAC GAC TTA ACC CAT TTA ACT AGA GTT TAA CTT AAA AAA GAA AGA GTA GAT TAT

UroL-Prt T N Y D L T H L T R V Q L K K E R V D Y

Pw-DNA ACT AAT TAT GAT TTA ACT TAT TTA ACG AAA GTT TAA CTG AAG AAA GAA AGA CAA GAC TTT

Pw-Prt T N Y D L T Y L T K V Q L K K E R V D F

Sn-DNA ACT AAC TAT GAC TTG ACC CAT Cta gct aag GTA CAA CTC TAA AAG GAT AGA Att gac ttt

Sn-Prt T N Y D L T H L A K V Q L Q K D R I D F

Sl-DNA ACC AAC TAT GAC CTT ACT CAT TTG ACA Aaa gtc tag ctC AAG AAA GAC AGa taa gat ttt

Sl-Prt T N Y D L T H L T K V Q L K K D R Q D F

Sh-DNA ACC AGT TAC GAT TTG ACT TAC CTC GCT AAA gtt caa ctA AAG AAA GAT AGa taa gac ttt

Sh-Prt T S Y D L T Y L A K V Q L K K D R Q D F

2701 MDS 24 2760

Ug1-DNA GAT GAT GAT CTT ATT AAC AGT TTC TAT GTT act aGT GAA AGA CTG TTT AAG TTA ATA GAG

Ug1-Prt D D D L I N S F Y V T S E R L F K L I E

Ug2-DNA GAT GAT GAT CTT ATT AAC AGT TTC TAT GTT act aGT GAA AGA CTG TTT AAG TTA ATA GAG

Ug2-Prt D D D L I N S F Y V T S E R L F K L I E

Hol-DNA GAT GAT GAA CTA TTG CCA CAG TTT TAT TAA TCA AGT GAA AGA ATA TTC TCA CTC GGT GAA

Hol-Prt D D E L L Q F Y Q S E R I T F S L G E

UroL-DNA GAT GAT GAT CGA CTT CCT AAA TTT TAT ATG TCT ACA GAT TTA CTA TTT TAG ATA GTA GAA

UroL-Prt D D D R L P K F Y M S T D L L F Q I V E

Pw-DNA GAT GAC GAC CTA ATT CCT TAA TTC TAT CTT TCA ACA GAA AGA CTA TTT TAA TTA GTT GAA

Pw-Prt D D D L I P Q F Y L S T E R L F Q L V E

Sn-DNA gat gat gat CTT TTG CCA ACT TTC TAT GTC CAA ATG GCA AAA CTG TTT TAA CTG ATT GAT

Sn-Prt D D D L L P T F Y V Q M A K L F Q L D

Sl-DNA gat gat gat TTG CTA CCT CAG TTC TAT TTA GCA TCT GAA CGC ATA TTT TAG CTC ATC GAG

Sl-Prt D D D L L P Q F Y L A S E R I F Q L I E

Sh-DNA gat gat gat CTC TTA CCA ACT TTA TAC ATT ACT TCA GAG AGA CTT TTC TCA TTG ATC GAT

Sh-Prt D D D L L P T L Y I T S E R L F S L I D

2761 MDS 25 2820

Ug1-DNA CAC ACT GAA AGA GAC TCT TAT CTC ACT TTC TCT Ctt atG CAA CAT TTG AGT GTC GTA CCT

Ug1-Prt H T E R D S Y L T F S L M Q H L S V V P

Ug2-DNA CAC ACT GAA AGA GAC TCT TAT CTC ACT TTC TCC Ctt atG CAA CAT TTG AGT GTC GTA CCT

Ug2-Prt H T E R D S Y L T F S L M Q H L S V V P

Hol-DNA CAT ACA GAA AAA GAT GCA TAT CTT ACT ATA TAA CTG ATG TTC CAT CTT TCT GTG ATC CCT

Hol-Prt H T E K D A Y L L I Q L M F H L S V I P

UroL-DNA CAT ACT GAA AAG GAC GCT TAT TTC ACT TTC TAG TTA ATG CTT CAC TTA TCT ATT ATT CCA

UroL-Prt H T E K D A Y L L I Q L M F H L S V I I P

Pw-DNA CAT ACT GAG AAG GAT TCA TAC TTT ACA TTT ATG CTG ATG CTA CAT TTA TCT ATT ATA CCC

Pw-Prt H T E K D S Y F T F M L M L H L S I I P

Sn-DNA CAC ACT GAG AAA GAC GCC TAT CTC ACT CTC TAA TTG ATG AAT CAC CTC TAG GTT ATT CCT

Sn-Prt H T E K D A Y L T L Q L M N H L Q V I P

Sl-DNA CAT TCT GAG AAA GAT TCC TAC TAT ACT TTT ATG CTT ATG CCT CAT CTA TCA ATT ATC CCC

Sl-Prt H S E K D S Y T F M L M P H L S I I P

Sh-DNA CAC ACT GAA AAA GAT GCT TAC TTG ACT ATT TAA CTT ATG AAT CAT CTC GCT ATT ATA CCT

Sh-Prt H T E K D A Y L T I Q L M N H L A I I P

2821 MDS 26 MDS 6 2880

Ug1-DNA CTA ACT AAA TAA CTT ACT TCa atT GCT GGT AAC TTG TGG TAT CGC TCG CTC TAG AAT GCT  
 Ug1-Prt L T K Q L T S I A G N L W Y R S L Q N A  
 Ug2-DNA CTA ACT AAA TAA CTT ACT TCa atT GCT GGT AAC TTG TGG TAT CGC TCG CTC TAG AAT GCT  
 Ug2-Prt L T K Q L T S I A G N L W Y R S L Q N A  
 Hol-DNA CTT ACT AAA TAA CTG ACT AAC ATC GCT GGT AAC CTC tgg ttt AGA TCA TTG TAA AAT GCA  
 Hol-Prt L T K Q L T N I A G N L W F R S L Q N A  
 UroL-DNA TTA ACA AAG CAA TTA ACT AAT ATT GCA GGT AAT TTA TGG TTT AGA TCC TTG TAA AAT GCG  
 UroL-Prt L T K Q L T N I A G N L W F R S L Q N A  
 Pw-DNA TTA ACA AAG CAA CTT ACT AAT ATT GCT GGT AAC TTA TGG TTT AGA TCA TTA TAA AAT GCA  
 Pw-Prt L T K Q L T N I A G N L W F R S L Q N A  
 Sn-DNA CTG ACT AAG CAA CTC ACA AAT ATC GCA GGT AAT CTT TGG TTT AGA TCT CTT CAA AAC GCC  
 Sn-Prt L T K Q L T N I A G N L W F R S L Q N A  
 Sl-DNA TTA ACC AAA CAA CTA ACT AAC ATT GCA GGT AAC TTA TGG TTT AGG TCT CTC TAA AAC GCC  
 Sl-Prt L T K Q L T N I A G N L W F R S L Q N A  
 Sh-DNA TTG ACC TTG CAG CTA ACT AAC ATT GCA GGT AAC TTA TGG TTC AGG TCT CTC TAA AAC GCT  
 Sh-Prt L T L Q L T N I A G N L W F R S L Q N A

2881 2940

Ug1-DNA AGA GCC GAA AGA AAT GAG ATG CTG CTC TTG CAT GAA TTC TAT GGA AAG AAG TAC TTA TGT  
 Ug1-Prt R A E R N E M L L L L H E F Y G K K Y L C  
 Ug2-DNA AGA GCC GAA AGA AAT GAG ATG CTG CTC TTG CAT GAA TTC TAT GGA AAG AAG TAC TTA TGC  
 Ug2-Prt R A E R N E M L L L L H E F Y G K K Y L C  
 Hol-DNA AGA GCT GAG CGA AAT GAA ATG CTA TTG CTT CAC GAA TTC AAA AAG AAG AAG TTC ATT CTT  
 Hol-Prt R A E R N E M L L L L H E F K K K K F T I L  
 UroL-DNA AGA GCA GAA AGA AAT GAA ATG CTT TTA CTT CAT GAG TTT AAA AAG AAG AAG TTC ATT CTA  
 UroL-Prt R A E R N E M L L L L H E F K K K K F T I L  
 Pw-DNA AGA GCA GAG AGA AAT GAA ATG CTT TTG CTG CAT GAG TTT AAG AAG AAG TAA TTC ATT TTA  
 Pw-Prt R A E R N E M L L L L H E F K K K Q F T I L  
 Sn-DNA AGA GCT GAA AGA AAT GAA ATG CTT CTA CTC CAC GAG TTC AAA AAG AAG AAG TTT GTC TTA  
 Sn-Prt R A E R N E M L L L L H E F K K K K F T V L  
 Sl-DNA AGA GCT GAA AGA AAC GAG ATG CTT TTG TTG CAT GAA TTC AAG AAG AAG AAA TTC ATT TTA  
 Sl-Prt R A E R N E M L L L L H E F K K K K F T I L  
 Sh-DNA AGA GCA GAG AGA AAC GAG ATG CTG TTA TTG CAT GAG TTC AAA AAG AAG AAG TTC ATA TTA  
 Sh-Prt R A E R N E M L L L L H E F K K K K F T I L

2941 MDS 27 MDS 28 3000

Ug1-DNA CCC Gat aaA ... GCA CCA TTT TcT aaa gat ... aaG AAA CAA TTT ... GAA GAC TAT GAA  
 Ug1-Prt P D K ... A P F S K D ... K K Q F ... E D Y E  
 Ug2-DNA CCA Gat aaa ... GCA CCA TTT TcT aaa gat ... aaG AAA CAA TTT ... GAA GAC TAT GAA  
 Ug2-Prt P D K ... A P F S K D ... K K Q F ... E D Y E  
 Hol-DNA CCA GAC AAA AAA CAA CTT ACC AAC AAA GAA CTC AAA AGA GGA CTC TTT GGT GAA GAG GAT  
 Hol-Prt P D K K Q L T N K E L K R G L F G E E D  
 UroL-DNA CCA GAT AAA AAA CCA CCT AAT GCT AAA GAT TTT AAG AGA GGC ATG CTT GGA GAG GAT TTT  
 UroL-Prt P D K K P P N A K D F K R G M L G E E F  
 Pw-DNA CCA GAT AAA AAG GCT TCT AAT GCA AAG GAT TTT AAA AGA AAT CTT GTA GGA GAA GAT TTC  
 Pw-Prt P D K K A S N A K D F K R N L V G E D F  
 Sn-DNA CCA GAC AAA AAG CAA CTT AAC GCC AAA GAC TTG AAG AAG AAC ATG TTT GCA GAT GAG TAC  
 Sn-Prt P D K K Q L N A K D L K K N M F A D E Y  
 Sl-DNA CCA GAT AAA AAG CCA CCT AAT GCT AAA GAC CTT AGA AGA GGA TTT ATG GGA GAT GAA TAT  
 Sl-Prt P D K K P P N A K D L R G F M C D E Y  
 Sh-DNA CCA GAC AAA AAA GCA CCC TTC GCT AAA GAT TTC AAG CGT AAT ATG TTT GCA GAT GAG TTT  
 Sh-Prt P D K K A P F A K D F K R N M F A D E F



3001 3060

Ug1-DNA AAT GAA AAT CTA TTT GGC AAT GAA GAA GTT AAA GGC AAC AAT AAA AAG AGA AAG AAG GCA  
 Ug1-Prt N E N L F G N E G V K G N N K K R K K A  
 Ug2-DNA AAT GAG AAT CTA TTT GGC AAT GAA GAA GTT AAA GGC AAC AAT AAA AAG AGA AAG AAG GCA  
 Ug2-Prt N E N L F G N E G V K G N N K K R K K A  
 Hol-DNA GAA CAA ... .. GGT GAT GAT AAG AAA AAA GGT GGA AAG AGA AAG AAG GCT  
 Hol-Prt E Q ... .. G D D K K K G G K R K K A  
 UroL-DNA GAA GAA ... .. AAC GAC AAT AAA AGA AAA GGC CCA AAG AGG AAG AAG GCT  
 UroL-Prt E E ... .. N D N K R K G P K R K K A  
 Pw-DNA GAG GAG ... .. GCT GAA CCA ACA GGA AAG AAA GGA GGA AAA AGG AAG AAG GCA  
 Pw-Prt E E ... .. A P T G K K G G K R K K A  
 Sn-DNA GAA GAG ... .. GGT GAT GGA AAG ACT AAA GGC GGC AAG AGG AAG AAA GCA  
 Sn-Prt E E ... .. G D G K T K G G K R K K A  
 Sl-DNA GAA GAG AAC ... .. GAT ACC AAA GGA GGA GGT AAA AAG GGA GGT AAG AGA AAG AAG GCG  
 Sl-Prt E E N ... .. D T K G G G K K G G K R K K A  
 Sh-DNA GAA GAG CTG ... .. AAG TCG GGC AAG GGA CCC AAA AAG GGA GGA AAG AGA AAG AAG GCA  
 Sh-Prt E E L ... .. K S G K G P K K G G K R K K A

3061 3120

*mds 30*

Ug1-DNA TAA TAT TCA GGT GGT TTA GTC ATT GAA CCT AAG GCA GGT TTC TAC GAT ACC ATC ATa ttG  
 Ug1-Prt Q Y S G G L V I E P K A G F Y D T I I L  
 Ug2-DNA TAA TAT TCA GGT GGT TTA GTC ATT GAA CCT AAG GCA GGT TTC TAC GAT ACC ATC ATa ttG  
 Ug2-Prt Q Y S G G L V I E P K A G F Y D T I I L  
 Hol-DNA CAG TAC TCT GGA GGT CTG GTT ATC GAA CCA AAR GCT GGT TTC TAT GAT AAT ATC CTA  
 Hol-Prt Q Y S G G L V I E P K A G F Y D N I I L  
 UroL-DNA TAA TAT GCA GGA GGT TTG GTC ATT GAA CCA AAA GCA GGA TTC TAT GAT AAT ATT ATC CTA  
 UroL-Prt Q Y A G G L V I E P K A G F Y D N I I L  
 Pw-DNA CAA TAT GCT GGT GGT CTC GTT ATT GAG CCA AAA GCT GGA TTC TAT GAT AAT ATT ATC TTA  
 Pw-Prt Q Y A G G L V I E P K A G F Y D N I I L  
 Sn-DNA GCG TAT GCA GGA GGT CTT GTG ATT GAA CCC AAG GCT GGT TTC TAT GAT AAT ATC ATC CTC  
 Sn-Prt A Y A G G L V I E P K A G F Y D N I I L  
 Sl-DNA aag tat gct ggA GGT CTC GTT ATA GAG CCA AAA GCA GGT TTC TAT GAC AAC ATT ATC TTG  
 Sl-Prt K Y A G G L V I E P K A G F Y D N I I L  
 Sh-DNA GCA TAT GCT GGT GGT CTG GTT ATC GAG CCT AAA GCT GGT TTC TAT GAT AAC ATC ATC TTG  
 Sh-Prt A Y A G G L V I E P K A G F Y D N I I L

3121 3180

*MDS 29* *MDS 30*

Ug1-DNA CTA CTA GAT TTT AAT TCG CTG TAT CCC TCG att atC TAG GAA TAC AAC TTA TGC TTC ACC  
 Ug1-Prt L L D F N S L Y P S I I Q E Y N L C F T  
 Ug2-DNA CTA CTG GAT TTC AAT TCA CTG TAT CCC TCG att atC TAG GAA TAC AAC TTA TGC TTC ACC  
 Ug2-Prt L L D F N S L Y P S I I Q E Y N L C F T  
 Hol-DNA TTG TTG GAC TTT AAC AGT CTT TAC CCC TCA ATT ATT CAG GAA TAC AAT CTT TGC TTC ACA  
 Hol-Prt L L D F N S L Y P S I I Q E Y N L C F T  
 UroL-DNA TTG CTC GAT TTC AAC TCT TTG TAT CCC TCT ATT ATT TAG GAA TAC AAC CTT TGT TTC ACA  
 UroL-Prt L L D F N S L Y P S I I Q E Y N L C F T  
 Pw-DNA CTA TTG GAT TTC AAC AGT TTG TAT CCT TCT ATT ATC CAA GAA TAT AAT CTA TGC TTT ACT  
 Pw-Prt L L D F N S L Y P S I I Q E Y N L C F T  
 Sn-DNA CTT CTA GAT TTC AAC TCT CTC TAC CCT TCA ATT ATT CAG GAG TAC AAC CTT TGC TTT ACA  
 Sn-Prt L L D F N S L Y P S I I Q E Y N L C F T  
 Sl-DNA CTT TTG GAT TTC AAC AGT TTG TAT CCC TCA ATT ATT CAA GAG TAC AAC CTC TGC TTT ACT  
 Sl-Prt L L D F N S L Y P S I I Q E Y N L C F T  
 Sh-DNA TTG TTG GAT TTC AAT TCA CTG TAT CCC AGT ATT ATT CAA GAG TAC AAT TTA TGC TTC ACA  
 Sh-Prt L L D F N S L Y P S I I Q E Y N L C F T

3181 MDS 27 3240

Ug1-DNA ACT GTT AAT AGA AGA CCA TCA AAG AAC TAT GAT AAT AGC GAT ATA AAA TCT AAG ... ..

Ug1-Prt T V N R R P S K N Y D N S D I K S K ... ..

Ug2-DNA ACT GTG AAT AGA AGA CCA TCA AAG AAC TAT GAT AAT AGC GAC ATA AAA TCT AAG ... ..

Ug2-Prt T V N R R P S K N Y D N S D I K S K ... ..

Hol-DNA ACA GTC AAC AGA AGA CCA ACT AAG AAC TAY AAT GGT ACT GAT ATT AAG AAT GAC TTT AAG

Hol-Prt T V N R R P T K N Y N G T D I K N D F K

UroL-DNA ACT GTG AAC CGT AGA CCT ACC AAG AAT TAT GAT GGC TCT GAA ATT AAA AAT TAA TTT AAG

UroL-Prt T V N R R P T K N Y D G S E I K N Q F K

Pw-DNA ACT GTT AAC AGA AGA CCA ACT AAG AAC TTT GAT GGA TCT GAA ATT AAA AAT TAA TTT AAG

Pw-Prt T V N R R P T K N F D G S E I K N Q F K

Sn-DNA ACT GTA AAC aga cGT CCT ACC AAG AAC TTC GAT GGC TCT GAA ATG AAG AAC TAG TAC AAG

Sn-Prt T V N R R P T K N F D G S E M K N Q Y K

Sl-DNA ACA GTA AAC AGA AGA CCA ACC AAG AAC TAC GAT GGC AGT GAA TTG AAA AAT CAA TDC AAA

Sl-Prt T V N R R P T K N Y D G S E L K N Q YCF K

Sh-DNA ACA GTT AAT CGT AGA CCA ACA AAG AAT TTC GAT GGT TCT GAA GTT AAA AGT CAA TTT AAG

Sh-Prt T V N R R P T K N F D G S E V K S Q F K

3241 MDS 32 3300

Ug1-DNA ... .. CAA GAT GAA AAT ATT GAT ... GAT GAA GTG GAA TTG CCT GAT AAA

Ug1-Prt ... .. Q D E N I D ... D E V E L P D K

Ug2-DNA ... .. CAA GAT GAA AAT ATT GAT ... GAT GAA GTG GAA TTG CCT GAT AAA

Ug2-Prt ... .. Q D E N I D ... D E V E L P D K

Hol-DNA ... .. GGA GAA GGT GAG GAA GAC AAC GAG GAA ACA GTT GAA CTC CCA GAT AAG

Hol-Prt ... .. G E G E E D N E E E T V E L L P D K

UroL-DNA ... .. ATT TAA GAT GAT GAT GAA AAC GAA GAA GAA GAG TAG TCT GAT CTT CCA GAC AAA

UroL-Prt ... .. I Q D D D E N E E E E Q S D L P D K

Pw-DNA GTG ... .. GGA GAA GAA GAT GAA GAG GTC GAA GAA TCT AGT CTT CCT GAT AAA

Pw-Prt V ... .. G E E D E E V E E S S L P D K

Sn-DNA AAA ... GGA GAA AAT GGG GAA GAA GAG GTA GAT ATT GAA GAA GCT GAT CTT CCT GAC AAG

Sn-Prt K ... G E N G E E V I E E A D L L P D K

Sl-DNA TCT GCT ... .. GAT AAC GCT GAR GGA GAY GAA GTC GAA GAT GTT GAT CTT CCA GAT AAG

Sl-Prt S A ... .. D N A E G D E V E D V D L P D K

Sh-DNA GCT GCT GGA ACA GAT Gct aat gaa GGC AAT GAA GTT GAA GAA GCA GAT CTT CCA GAT AAG

Sh-Prt A A G T D A N E G N E V E E A D L P D K

3301 3360

Ug1-DNA GGT AAC ACC TAT AAA GAT GCC ATT TTG CCT AAT GTG CTG AAG AAT TTG GTA TAA AAG AGG

Ug1-Prt G N T Y K D A I L P N V L K N L V Q K R

Ug2-DNA GGT AAC ACC TAT AAA GAT GCC ATT TTG CCT AAT GTG CTT AAG AAT TTG GTA TAG AAG AGA

Ug2-Prt G N T Y K D A I L P N V L K N L V Q K R

Hol-DNA AAC ACT AAG GCC AAT GAT GCA GTA TTG CCA AAT GTT CTG AGA GAC TTA GTA CAG AAG AGA

Hol-Prt N T K A N D A V L P N V L R D L V Q K R

UroL-DNA AAT GTG AAC CTA AAG GAT GCT GTA CTT CCT AAT GTC TTG CGT GAC TTG GTT TAA AAA AGA

UroL-Prt N V N L K D A V L P N V L R D L V Q K R

Pw-DNA AAT GTC AAT ATA AAA GAT GCA GTA TTA CCA AAT GTG CTT AGA GAT TTA GTC CAG AAG AGA

Pw-Prt N V N I K D A V L P N V L R D L V Q K R

Sn-DNA AAT GTA AAC TTG AAG GAT GCA GTG CTT CCC ATG GTT TTG AGA GAC CTC GTC TAA AAG AGA

Sn-Prt N V N L K D A V L P M V L R D L V Q K R

Sl-DNA AAT GTG AAC ATC AAG GAT GCT GTA CTT CCA ART GTA CTC AGA GAT TTG GTT TAA AAG AGA

Sl-Prt N V N I K D A V L P NS V L R D L V Q K R

Sh-DNA AAT GTT AAT GTC AAA GAC GCT GTA CTT CCA AAT GTC TTA AGA GAT TTA GTT CAG AAA CGT

Sh-Prt N V N V K D A V L P N V L R D L V Q K R

3361 3420

Ug1-DNA AAA ATT GTC AAA GAG TAA CTA AAG AAG GAA ACT GAC CCT GTC AAA TAG CAA TAA CTC GAA  
 Ug1-Prt K I V K E Q L K K E T D P V K Q Q Q L E E  
 Ug2-DNA AAG ATT GTC AAA GAG CAA CTA AAG AAG GAA ACT GAC CCA GTC AAA TAG CAA TAA CTC GAA  
 Ug2-Prt K I V K E Q L K K E T D P V K Q Q Q L E E  
 Hol-DNA AAR GCT GTG AAG GAT AAG ATG AAG ACC GAA AAA GAC CCA ATA AAA CTT TAA TAG CTA GAA  
 Hol-Prt K A V K D K M K T E K D P I K L Q Q L E E  
 UroL-DNA AGA GCT GTT AAA GAT AAG ATG AAG AAT GAA AAG GAT TAA ATT AAA CTA CAA TAG CTT GAA  
 UroL-Prt R A V K D K M K N E K D Q I K L Q Q Q L E E  
 Pw-DNA AAG GCT GTT AAA GAA AAA ATG AAG AAT GAG AAA GAT TCA GTT AAG CTT TAA TAA CTT GAA  
 Pw-Prt K A V K E K M K N E K D S V K L Q Q L E E  
 Sn-DNA AAA GCT GTC AAG GAC AAG ATG AAA ACT GAA AAA GAT CAC GTC AAG TTA TCG CAA TTA GAA  
 Sn-Prt K A V K D K M K T E K D H V K L S Q L E E  
 Sl-DNA AAA GCT GTM AAG GAA AAG ATG AAG AAT GAA RAG GAT CAG GYG AAR CTC TAA CAA CTT GAA  
 Sl-Prt K A V K E K M K N E KE D Q VA K L Q Q L E E  
 Sh-DNA AAA GCA GTT AAA GAA AAG ATG AAG AAT GAG AAG GAC GCA GTT AAG CTT TCA CAA CTG GAA  
 Sh-Prt K A V K E K M K N E K D A V K L S Q L E E

3421 MDS 31 20 30 28 31 33 3480

Ug1-DNA ATT AGA TAG AAG GCA ATA AAG TTG ACT GCT aat agT ATG TAT GGG TGC TTG GGT TTC TCC  
 Ug1-Prt I R Q K A I K L T A N S M Y G C L G F S  
 Ug2-DNA ATT AGA TAG AAG GCA ATA AAG TTG ACA GCT aat agT ATG TAT GGG TGC TTG GGT TTC TCC  
 Ug2-Prt I R Q K A I K L T A A N S M Y G C L G F S  
 Hol-DNA ATC AGA TAG AAG GCC ATT AAG TTG ACA GCC AAC TCG ATG TAT GGT TGC TTG GGA TTC GCT  
 Hol-Prt I R Q K A I K L T A A N S M Y G C L G F A  
 UroL-DNA ATC AGG TAA AAA GCT ATT AAG CTT ACT GCa aac agt atg tat ggt TGT CTT GGT TTT GGT  
 UroL-Prt I R Q K A I K L T A A N S M Y G C L G F G  
 Pw-DNA ATC AGG TAG AAG GCT ata aaa tta aCA GCA AAC AGC ATG TAT GGT TGC TTG GGA TTT GGC  
 Pw-Prt I R Q K A I K L T A A N S M Y G C L G F G  
 Sn-DNA ATC AGA TAA AAG GCT ATT AAG CTT ACT Gct aac agt atg tat ggT TGC CTT GGA TTT GGT  
 Sn-Prt I R Q K A I K L T A A N S M Y G C L G F G  
 Sl-DNA ATC AGA TAG AAA GCT ATT AAG YTG ACT GCT AAC AGT Atg tat ggt tgc ttr GGT TTT AGT  
 Sl-Prt I R Q K A I K L T A A N S M Y G C L G F S  
 Sh-DNA ATC AGG CAA AAA GCT ATC AAG CTC ACT GCT AAC agT ATG TAT GGT TGC CTT GGT TTT GGC  
 Sh-Prt I R Q K A I K L T A N S M Y G C L G F G

3481 MDS 32 3540

Ug1-DNA TCT TCG AGA TTC CAT GCC AAA GCT ATA GCT GCA CTC att aCT AAA ACT GGC AGA GAG ACC  
 Ug1-Prt S S R F H A K A I A A L I T K T G R E T  
 Ug2-DNA TCA TCG AGA TTC CAT GCC AAA GCT ATA GCT GCA CTC att aCT AAA ACT GGC AGA GAG ACC  
 Ug2-Prt S S R F H A K A I A A L I T K T G R E T  
 Hol-DNA AGT TCC AGA TTC CAC GCA AAG GCT ATT GCC GCT CTG ATC ACA AGA ACC GGC AGA GAA ACT  
 Hol-Prt S S R F H A K A I A A L I T R T R T G R E T  
 UroL-DNA TCC TCA AGA TTC CAT GCT AGA GCC ATT GCT GCA CTA ATT ACT AGA ACa ggc aga GAA ACT  
 UroL-Prt S S R F H A R A I A A L I T R T R T G R E T  
 Pw-DNA TCA TCT AGA TTC CAT GCC AAA GCA ATT GCA GCT TTG ATT ACT AGA ACT GGa aga gaA ACT  
 Pw-Prt S S R F H A K A I A A L I T R T R T G R E T  
 Sn-DNA TCG TCC CGT TTC CAT GCT CAA GCT ATA GCT GCT CTT ATT ACA AGA ACT GGA AGA GAA ACT  
 Sn-Prt S S R F H A Q A A A L I A A L I T R T G R E T  
 Sl-DNA TCC TCC AGA TTC CAC GCT TCA GCT ATT GCA GCT CTG ATT ACA AAG ACT GGT aga gaa acC  
 Sl-Prt S S R F H A S A A A L I A A L I T R T R T G R E T  
 Sh-DNA TCA TCT AGA TTC CAT GCT TAA GCA ATT GCT GCC CTA ATT ACC AAA ACT GGA AGA GAT ACA  
 Sh-Prt S S R F H A Q A A A L I A A L I T R T G R D T

3541 **MDS 21 31** *mds 29 32 34* **MDS 22 32 30 33 35** 3600

Ug1-DNA TTA CTG AAG ACT AAA GAT ATT GCG GAG AAT AAG CTA GGC TTT AAT GTC GTC TAT GGT GAT  
Ug1-Prt L L K T K D I A E N K L G G F N V V Y G D  
Ug2-DNA TTA CTG AAG ACT AAA GAT ATT GCA GAG AAT AAG CTA GGC TTT AAT GTC GTC TAT GGT GAT  
Ug2-Prt L L K T K D I A E N K L G G F N V V Y G D  
Hol-DNA CTC CTA AGA ACA AAA GAT ATC GCT GAG AAC AAA CTG GGA TTC AAT GTT GTG TAT GGT GAT  
Hol-Prt L L R T K D I A E N K L G G F N V V Y G D  
UroL-DNA TTA TTA AGA ACA AAG GAT ATT Gct gag aat AAA TTA GGC TTT AAT GTT GTT TAT GGT GAT  
UroL-Prt L L R T K D I A E N K L G G F N V V Y G D  
Pw-DNA CTT CTT AGA ACT AAG GAT Att gct gaG AAT AAA TTA GGT TTT AAC GTA GTT TAT GGT GAT  
Pw-Prt L L R T K D I A E N K L G G F N V V Y G D  
Sn-DNA CTA CTG AGA ACT AAG GAC ATC GCA GAA AAT AAG CTT GGA TTC AAT GTA GTG TAT GGT GAT  
Sn-Prt L L R T K D I A E N K L G G F N V V Y G D  
Sl-DNA CTT CTA AGA ACA AAA GAT Att gct GAG AAT AAG YTA GGC TTT AAC GTT GTG TAT GGT GAW  
Sl-Prt L L R T K D I A E N K L G G F N V V Y G ED  
Sh-DNA CTC CTA AGA ACC AAG GAC ATT GCT GAG AAT AAA TTA GGT TTC AAT GTT GTA TAT GGA GAT  
Sh-Prt L L R T K D I A E N K L G G F N V V Y G D

3601 **MDS 33** **MDS 34** 3660

Ug1-DNA ACT GAC TCC ATT ATG ATC AAT TCA GGG ACA Act aat ATC GAA Gag gca CTG AAG ATG GGT  
Ug1-Prt T D S I M I N S G T T N I E E A L K M G  
Ug2-DNA ACT GAC TCC ATT ATG ATC AAT TCA GGG ACA Act aat ATC GAA Gag gca CTG AAG ATG GGT  
Ug2-Prt T D S I M I N S G T T N I E E A L K M G  
Hol-DNA ACC GAT TCA ATT ATG ATA AAC ACT GGG TGC AAC TAG CTG TAA ATG GCA TTA GAA ATG GGA  
Hol-Prt T D S I M I N T G C N Q T Q M A L L M G  
UroL-DNA act gac tCT ATT ATG ATC AAC ACT GGT ACT AAT ATT TTA CAA TAA GCT CTT GAA ATG GGT  
UroL-Prt T D S I M I N T G C T N I L Q Q A L E M G  
Pw-DNA ACT GAT TCT att atg att aat ACA GGT TCT AAT CAG CTT CAA TAG TCA TTA GAA ATG GGT  
Pw-Prt T D S I M I N T G S N Q L Q Q S L E M G  
Sn-DNA ACT GAC TCA ATC ATG ATT AAT ACA GGC AGC AAT CAA CTT TAG CAA GCC TTA GAA ATG GGA  
Sn-Prt T D S I M I N T G S N Q L Q Q A L L M G  
Sl-DNA ACT GAT TCT att atg atc aat ACT GGT ACT AAY CAA CTT CAG TAA TCA CTT GAG ATG GGC  
Sl-Prt T D S I M I N T G T N Q L Q Q S L E M G  
Sh-DNA ACT GAT TCT ATA ATG ATC AAT ACT GGA ACA AAT TAA TTA CAA TAG TCT TTA GAA ATG GGT  
Sh-Prt T D S I M I N T G T N Q L Q Q S L E M G

3661 **MDS 23 33** *mds 31 34 36* **MDS 35** 3720

Ug1-DNA CAT AGA ... TTG AAA TAG GAA GTC AAC TAG CAT tat aaa tGC TTG GAA ATT GAA ATC GAT  
Ug1-Prt H R ... L K Q E V N Q H Y K C L E I E I D  
Ug2-DNA CAT AGA ... TTG AAA TAG GAA GTC AAC TAG CAT tat aaa tGC TTA GAA ATT GAA ATC GAT  
Ug2-Prt H R ... L K Q E V N Q H Y K C L E I E I D  
Hol-DNA AAG AAA ... CTG AAG GCT GAA GTC AAT TGT CTA TAT AAG TGT CTA GAA ATC GAA ATT GAT  
Hol-Prt K K ... L K A E V N C L Y K A L E I E I D  
UroL-DNA AAA AGA ... CTT AAG GTG GAG GTC AAT GGT TTC TAT AAA TGT TTG GAA ATC GAA ATT GAC  
UroL-Prt K R ... L K V E V N G F Y K C L E I E I D  
Pw-DNA AAG AGG ... CTA AAG GTT GAG GTC AAT TAA TTA TAT AAG TGC TTA GAA ATC GAA ATA GAT  
Pw-Prt K R ... L K V E V N Q L Y K C L E I E I D  
Sn-DNA AAG AGA ... CTA AAA GGA GAA GTA AAC TGC TTG TAC AAA TGC CTT GAA ATA GAA ATA GAT  
Sn-Prt K R ... L K G E V N C L Y K C L E I E I D  
Sl-DNA AAA AAA ... CTT AAA GTT GAA GTT AAT TGY CTC TAT AAA TGC CTT GAA ATW GAA ATW GAT  
Sl-Prt K K ... L K V E V N C L Y K C L E I E I D  
Sh-DNA AAG AGA CCT CAA GGC CTG AAG TTA ATT GCC TTA TAT AAG TGC ctt gag atA GAA ATC GAT  
Sh-Prt K R P Q G L K L I A L Y K C L E I E I D

3721 MDS 36 24 34 32 35 37 3780

Ug1-DNA GGA CTT TTC AAA TCC CTC tta tTG CTA AAG AAG AAG AAA TAT GCT GCC TTA AAG GTA GAG  
 Ug1-Prt G L F K S L L L L L K K K K Y A A L K V E  
 Ug2-DNA GGA CTT TTC AAA TCC CTC tta tTG CTA AAG AAG AAA AAG TAT GCT GCC TTA AAG GTA GAG  
 Ug2-Prt G L F K S L L L L L K K K K Y A A L K V E  
 Hol-DNA GGG GTG TTC AAG AGT TTG TTA CTG CTT AAA AAG AAA AAG TAT GCG GCA TTG AAG TAT GAA  
 Hol-Prt G V F K S L L L L L K K K K Y A A L K Y E  
 UroL-DNA GGT GTT TTC aaa agT TTA CTA CTT CTT AAG AAA AAG AAA TAT GCT GCT CTT AAA TAT GAA  
 UroL-Prt G V F K S L L L L L K K K K Y A A L K Y E  
 Pw-DNA Gga gtt ttt aaA AGT TTA TTA CTA TTA AAG AAA AAG AAA TAT GCT GCA CTT AAA TAT GAA  
 Pw-Prt G V F K S L L L L L K K K K Y A A L K Y E  
 Sn-DNA GGA GTT TTT AAG AGT TTG CTC TTA TTG AAA AAA AAG AAG TAT GCA GCT CTG AAG TAT GAA  
 Sn-Prt G V F K S L L L L L K K K K Y A A L K Y E  
 Sl-DNA GGT Gkt ttc aag agt tTA CTT TTA CTA AAG AAA AAG AAA TAT GCT RCT TTG AGR TAT GAA  
 Sl-Prt G VG F K S L L L L L K K K K Y A TA L R Y E  
 Sh-DNA GGT GTG TTC AAG AGT TTA CTA CTT CTT AAG AAA AAG AAG TAT GCT GCA CTT AAA TAT GAA  
 Sh-Prt G V F K S L L L L L K K K K Y A A L K Y E

3781 MDS 25 35 mds 33 36 38 3840

Ug1-DNA AAT TTT ATG TCA CCT GAC CGA AAA ACC ATT ATA AAG GAA TGC AAG GGA CTT GAT ATG GTT  
 Ug1-Prt N F M S P D R K T I I K E C K G L D M V  
 Ug2-DNA AAT TTT ATG TCA CCT GAC CGA AAA ACC ATT ATA AAG GAA TGC AAG GGA CTT GAT ATG GTT  
 Ug2-Prt N F M S P D R K T I I K E C K G L D M V  
 Hol-DNA AAT TGG ACT ACT CCT ... GAT GCT AAG ATA GTA CAG GAG ATG AAG GGA CTA GAT ATG GTT  
 Hol-Prt N W T T P ... D A K I V Q E M K G L D M V  
 UroL-DNA GGT TAT GGT TCT CCT ... Gat gtt aaa gtt ata CAA GAA ATG AAG GGT CTT GAT ATG GTA  
 UroL-Prt G Y G S P ... D V K V I Q E M K G L D M V  
 Pw-DNA GGA TTT GGA ACW CCA ... GAA Gtt aaa gta GTW TAA GAA ATG AAA GGT CTT GAT ATG GTT  
 Pw-Prt G F G P ... E V K V V Q E M K G L D M V  
 Sn-DNA AAC TTC CTA AGT CCA GCT GAA GTT AAA GTA GTT CAA GAA ATG AAG GGA CTC GAT ATG GTG  
 Sn-Prt N F T S P A A E V K V V Q E M K G L D M V  
 Sl-DNA GGT GTT GGY Tcy ... aat gaA GTC AAA GTA ATT CAA GAA ATG AAA GGT CTT GAT ATG GTY  
 Sl-Prt G V G S ... N E V K V I Q E M K G L D M V  
 Sh-DNA GGT TTT GGC ACT CCA ... GAT GCT aaa gta gtt tag GAA GTT AAA GGT CTT GAT ATG GTT  
 Sh-Prt G F G T P ... D A K V V Q E V K G L D M V

3841 MDS 7 3900

Ug1-DNA CGT AGA GAT TGG TGT GCC CTA GCC AAG AAT GCT GGT GAT TTT GTG CTT GAT TAA ATT CTC  
 Ug1-Prt R R D W C A L A K N A G D F V L D Q I L  
 Ug2-DNA CGT AGA GAT TGG TGT GCC CTA GCC AAG AAT GCT GGT GAT TTT GTG CTT GAT TAA ATT CTC  
 Ug2-Prt R R D W C A L A K N A G D F V L D Q I L  
 Hol-DNA AGA AGA GAT TGG TGC TAA CTA TCT AAG ACT GTT GGT AAC TAT Gta CTC GCA CAA ATC CTA  
 Hol-Prt R R D W C Q L S K T V G G A Y V L A Q I L  
 UroL-DNA AGA AGA GAT TGG TGT CCA CTT TCT AAA ACA GTA GGC AAT TAT GTG CTA Ggt caa ATT CTT  
 UroL-Prt R R D W C P L S K T V G G A Y V L G Q I L  
 Pw-DNA AGA AGA GAT TGG TGT CCW TTA TCT AAA ACT GTG Ggt aat taT GTA TTA GGC TAA ATT TTA  
 Pw-Prt R R D W C P L S K T V G G N Y V L G Q I L  
 Sn-DNA AGA AGA GAC TGG TGC CCC CTC TCC AAG AGA GTT GGT AGA TAT GTA CTA GAC TAG ATT TTA  
 Sn-Prt R R D W C P L S K R V G R Y V L D Q I L  
 Sl-DNA AGA AGA GAK TGG TGT CCT CTC TCR AAG TCT ATT Gga aat tat gTT CTC AGC CAA ATT TTA  
 Sl-Prt R R DE W C P L S K S I G N Y V L S Q I L  
 Sh-DNA AGA AGA GAT TGG TGC Cca ctt tca aAG AAT GTT GGT AAT TTT GTC CTC AAT CAA ATT CTA  
 Sh-Prt R R D W C P L S K N V G N F V L N Q I L

3901 *MDS 26 36 34 37 39* 3960

Ug1-DNA AGT GGA CAA TAA AGA GAG GAT ATT GTA CTC ACT TTG ACC GAG CAT TTA TCT aac ttG GGA  
 Ug1-Prt S G Q Q R E D I V L T L T E H L S N L G  
 Ug2-DNA AGT GGA CAA TAA AGA GAG GAT ATT GTA CTC ACT TTG ACC GAG CAT TTA TCT aac ttG GGA  
 Ug2-Prt S G Q Q R E D I V L T L T E H L S N L G  
 Hol-DNA TCA GGA AAA TAA AGA GAA GAA GTA GTA CTA AAT CTA AAT GAA TAC CTT TCT GAT ATT GGA  
 Hol-Prt S G K Q R E E V V L N L N E Y L S D I G  
 UroL-DNA TCA GGA AAA TCT AGA GAA GAA GTA GTA ATG AAT CTC AAT GAG TAT TTA TCT GAT Att ggt  
 UroL-Prt S G K S R E E V V M N L N E Y L S D I G  
 Pw-DNA TCT GGA AAG CAA AGA GAA GAA GTT GTT CTT AAC CTT AAC GAA TAC TTA TCT GAT ATT GGT  
 Pw-Prt S G K Q R E E V V L N L N E Y L S D I G  
 Sn-DNA TCT GGA AAG CAA AGA GAA GAA GTC GTT CTA AAC TTG AAT GAG TTT CTT TCA AAC ATA GGA  
 Sn-Prt S G K Q R E E V V L N L N E F L S N I G  
 Sl-DNA TCA GGC AAR YAA RGR GAR GAT GTA GTA TTC AAC CTG AAY GAA TAC TTA TCT Gat att gga  
 Sl-Prt S G K Q RSG E D V V F N L N E Y L S D I G  
 Sh-DNA TCC GGA AAA CAA AGA GAA GAT GTT GTG TTA AAC TTG AAT GAA TAT TTG TCT GAT ATT GGT  
 Sh-Prt S G K Q R E D V V L N L N E Y L S D I G

3961 *MDS 37 MDS 27 37 mds 35 38 40* 4020

Ug1-DNA CAA CGT ATG AAG AAC AAT CAG ATT CCT TTG AAA GAG TAC GTT ATT AAT AAG TAG ATA ACG  
 Ug1-Prt Q R M K N N Q I P L K E Y V I N K Q I T  
 Ug2-DNA CAA CGT ATG AAG AAC AAT CAG ATT CCT TTG AAA GAG TAC GTT ATT AAT AAG TAG ATA ACG  
 Ug2-Prt Q R M K N N Q I P L K E Y V I N K Q I T  
 Hol-DNA TAA AAG ATG AAG GCC TGT GAA ATC CCT CTT GCT GAG TAT ATC ATT ACC AAG TAA CTT ACC  
 Hol-Prt Q K M K A C E I P L A E Y I I T T K Q L T  
 UroL-DNA gAA AGG ATG AAG AGC AAT AGA ATA ACT CTT GAC caa tat atC ATT ACT AAG TAA TTA ACT  
 UroL-Prt E R M K S N R I T L D Q Y I I T K Q L T  
 Pw-DNA Gat aaa atg aAG ACT AAC AGa ata act ttA GAT CAG TAT ATT ATC ACT AAA CAG TTA ACA  
 Pw-Prt D K M K T N R I T L D Q Y I I T K Q L T  
 Sn-DNA AAC GAG CTA AAA GAA GGA ACT ATC AAA CTA AAC GAG TTT ATT ATT ACT AAG CAA ATT ACC  
 Sn-Prt N E L K K G T N I T K N E F I I T T K Q I T  
 Sl-DNA gag AAA ATG AAG AGC AAT AGA ATA ACT CTA Gat caa ttC ATC ATA ACA AAG CAA CTT ACW  
 Sl-Prt E K M K S N R I T L D Q F I I T K Q L T  
 Sh-DNA GAA AAG atg aaa aat aAT GGA ATC Acc ttg gat caA TTT ATC ATT ACT AAG CAA CTG ACT  
 Sh-Prt E K M K N N G I T L D Q F I I T K Q L T

4021 *MDS 28 38 36 39 41* *MDS 38* 4080

Ug1-DNA AGA GCA TTG AGC GAA TAT CAT GAT ACT AAA GCA CTG CCA Cat gtT GCT GTG GCC TTA CGA  
 Ug1-Prt R A L S E Y H D T K A L P H V A V A L R  
 Ug2-DNA AGA GCA TTG AGC GAA TAT CAT GAT ACT AAA GCA CTG CCA Cat gtT GCT GTG GCC TTA CGA  
 Ug2-Prt R A L S E Y H D T K A L P H V A V A L R  
 Hol-DNA AGA GCT ATC TCA GAG TAC TCT GAC ATT AAA GGC CAG CCC CAT GTC ATC ATT GCC ATG AGA  
 Hol-Prt R A I S E Y S D I K G Q P H V I I A M R  
 UroL-DNA AGA GCT ATC GCA GAT TAT AAC GAC ATC AAG GGT TAA CCA CAT GTT CAA ATT GCT ACA AGA  
 UroL-Prt R A I A D Y N D I K G Q P H V Q I A T R  
 Pw-DNA AGA TAA ATT TCT GAA TAT TCT GAT ATC AAA GGA CAG CCT CAT GTC ATG GTG GCT CAA AGA  
 Pw-Prt R Q I S E Y S D I K G Q P H V M V A Q R  
 Sn-DNA AAG GCA ATT AGT GAT TAC AAT GAT ATC AAG GGA TAA CCT CAT GTC GCA GTT GCC AAA AGA  
 Sn-Prt K A I S D Y N D I K G Q P H V A V A K R  
 Sl-DNA AGA GCY ATT TCA GAG TAT TCT GAT ATC AAA GGA TAA CCM CAT GTG GCA GTT GCT CAA AGA  
 Sl-Prt R A I S E Y S D I K G Q P H V A V A Q R  
 Sh-DNA AAG GCA ATC TCT GAG TAC TCA GAT ATC AAG GGA CAA CCA CAT GTT GCA GTT GCT CAA AGA  
 Sh-Prt K A I S E Y S D I K G Q P H V A V A Q R

4081 MDS 29 39 mds 37 40 42 MDS 30 40 38 41 43 4140

Ug1-DNA TTG AAG AAT TAG GGA AAA TCT GAG GCA GAT TTG ... .. AAT TTT ATT CCC TAT Gtt att

Ug1-Prt L K N Q G K S E A D L ... .. N F I P Y V I

Ug2-DNA TTG AAG AAT TAG GGA AAA TCT GAG GCA GAT TTG ... .. AAT TTT ATT CCC TAT Gtt att

Ug2-Prt L K N Q G K S E A D L ... .. N F I P Y V I

Hol-DNA CAA AAA GCC TTG GGC AAA TCA GAA TCT GAA CTG GTC AAC AAC TTC ATC CCT TAT GTT ATC

Hol-Prt Q K A L G K S E S E L V N N F I P Y V I

UroL-DNA TTA AAG AAA TAA GGa aaa agt gaa gca GAT CTA GTA GGA Ggc ttc atC CCT TAT GTA ATT

UroL-Prt L K K Q G K S E A D L V G G F I P Y V I

Pw-DNA TTA AAG AAT CTT GGT Aaa agt gaa gct GAT CTA GTC aac aat tTC ATT CCT TAT GTA ATC

Pw-Prt L K N L G K S E A D L V N F I P Y V I

Sn-DNA CTT AGA GAT TAA GGA AAG AGC GAA AAT CAG CTT GTC AAC AAT TTC ATT CCT TAC GTA ATT

Sn-Prt L R D Q G K S E N Q L V N N F I P Y V I

Sl-DNA CTT AAA AAT TAA Gga aag aGT GAG GCA GAT CTT GTC aat aat tTC ATC CCT TAT GTT ATT

Sl-Prt L K N Q G K S E A D L V N N F I P Y V I

Sh-DNA CTT AAG AAT CAA GGA aag agt gaa tCA GAT CTA Gtg aac aac ttt ATC CCT TAT GTA ATT

Sh-Prt L K N Q G K S E S D L V N N F I P Y V I

4141 MDS 39 mds 39 42 44 MDS 40 43 45 4200

Ug1-DNA tGC ACT ... .. GAA TAG GAC AAG AAA TCA CAA TTC TTA TCT GAA AAG GCT TAC

Ug1-Prt C T ... .. E Q D K K S Q F L S E K A Y

Ug2-DNA tGC ACT ... .. GAA TAG GAC AAG AAA TCA CAA TTC TTA TCT GAA AAA GCT TAC

Ug2-Prt C T ... .. E Q D K K S Q F L S E K A Y

Hol-DNA TGC AAA AAA CCA TTT ... GAC GCA GAA AAG TTA ACC CCA TAA TTG GCG GAT AAG GCT TTC

Hol-Prt C K K P F ... D A E K L T P Q L A D K A F

UroL-DNA TGT ACT GAA ACT TTT ... GAA CCT TCT AAA ACC AAT CCA GGT TTG GCT GAT AGA GCC TAT

UroL-Prt C T E T F ... E F S K T N P G L A D R A Y

Pw-DNA GGT GTT AGT CCA TTC ... GAG CCA AGT AAG CAG AAT CCT TAA TTA GCT GAC AAA GCA TAT

Pw-Prt G V S P F ... E P S K Q N P Q L A D K A Y

Sn-DNA TGC CAG CAG ACA TAC GGA GAT ACT ACC AAA TCA AGC ACA GCA CTC TCA GAT AAG GCT TAC

Sn-Prt C Q Q T Y G D T K S S C T A A L S D K A Y

Sl-DNA GGa gct caa GCA TTT ... GAT ACA GCT aag tca aaC CAA TTA TCA GAT AAG GCT TAT

Sl-Prt G A Q A F ... D T A K S N P Q L S D K A Y

Sh-DNA Ggt gct tag CCT TTT ... GAT CCA AGC AAA ACT AAC CCA GCA TTG GCA GGC AAG GCA TAT

Sh-Prt G A Q P F ... D P S K T N P A L A G K A Y

4201  4260

Ug1-DNA CAC CCT GAT GAA GTG CTC ACA TCA AAA GGT AAG ATT CAA CTT GAT GTT GAT TGG TAT ATA

Ug1-Prt H P D E V L T S K G K I Q L D V D W Y I

Ug2-DNA CAC CCT GAT GAA GTG CTC ACA TCA AAA GGT AAG ATT CAA CTT GAT GTT GAT TGG TAT ATA

Ug2-Prt H P D E V L T S K G K I Q L D V D W Y I

Hol-DNA CAT CCT GAG GAA GTC ATA AAC TCT AGA GGC AAA CAT GAA ATT GAC ATC GAT TGG TAC ATT

Hol-Prt H P E E V I N S R G K H E I D I D W Y I

UroL-DNA CAT CCA GAT GAA GTT GCC TCT TCT AAA GGC AAA GTA CAA CTT GAC AAT GAA TGG TAT ATT

UroL-Prt H P E A V A S S K G K V L D N E Y Y I

Pw-DNA CAT CCA GAT GAA GTA TTG AGT TCA AAA GGA AAA GTA TTG ATA GAT ATA GAT TGG TAT ATT

Pw-Prt H P D E V L S S K G K V L I D I D W Y I

Sn-DNA CAC CCA GAT GAA GTG ATT AGC TCA AGA GGA AAA GTG ACT ATA GAT AGT GAC TGG TAT GTG

Sn-Prt H P D E V I S S R G K V T I D S D W Y V

Sl-DNA CAT CCA GAT GAG CTC TTA TCC TCC AAG GGT AAG ATT ACY CTT GAT ATT GAT TGG TAT ATT

Sl-Prt H P D E L L S S K G K I T L D I D W Y I

Sh-DNA CAC CCT GAA GAG GTT GTC TCC TCT AAA GGG AAA ATT TTG CTA GAT ATT GAG TGG TAC ATC

Sh-Prt H P E E V V S S K G K I L L D I E W Y I

4261 4320

Ug1-DNA ACT CAA TAA ATT TTG CCA ATT ATT TCA AGA TTA ATT GAG CAT ATT GAG GGA ATT GAG GCA  
 Ug1-Prt T Q Q I L P I I S R L I E H I E G I E G A  
 Ug2-DNA ACT CAA TAA ATT TTG CCA ATT ATT TCA AGA TTA ATT GAG CAT ATT GAG GGA ATT GAG GCA  
 Ug2-Prt T Q Q I L P I I S R L I E H I E G I E G A  
 Hol-DNA ACT GCC TAG ATC CTC CCA CCA ATC ACT CGT CTC ATT GAG CAT ATC GAT GGT ATC GAT GTT  
 Hol-Prt T A Q I L P P I T R L I E H I D G I D V  
 UroL-DNA ACA TAG TAA ATA TTG CCA CCA ATA ACC AGA TTA ATT GAA CAT ATT GAC GGT ATT GAT GTT  
 UroL-Prt T Q Q I L P P I T R L I E H I D G I D V  
 Pw-DNA ACC TAA TAG ATC TTG CCT CCA ATT ACA AGG CTA ATA GAG CAT ATA GAT GGT ATT GAT GTT  
 Pw-Prt T Q Q I L P P I T R L I E H I D G I D V  
 Sn-DNA TCT ACC TAA TTG CTT CCT CCC ATC ACC AGA CTG ATA GAG CAT ATC GAG GGA ATC GAA GTT  
 Sn-Prt S T Q L L P P I T R L I E H I E G I E V  
 Sl-DNA RCT ACT CAG ATT CTT CYT CCA ATT ACT AGA CTT ATT GAR CAC ATC GAT GGK ATT AAT ATC  
 Sl-Prt TA T Q I L PL P I T R L I E H I D G I N I  
 Sh-DNA ACC ATG CAA GTC TTA CCA CCA ATA ACC AGA CTT ATC GAA CAT ATT GAC GGT ATT GAT GTG  
 Sh-Prt T M Q V L P P I T R L I E H I D G I D V

4321 4380

MDS 31

Ug1-DNA GAT TTT ATT GCA CAA TGC TTT GGT ATT GAC CCA AAG AAG TAT AAA TAT ACC TCT TCT ATA  
 Ug1-Prt D F I A Q C F G I D P K K Y K Y T S S I  
 Ug2-DNA GAT TTT ATT GCT CAA TGC TTT GGT ATT GAC CCA AAG AAG TAT AAA TAT ACC TCT TCT ATA  
 Ug2-Prt D F I A Q C F G I D P K K Y K Y T S S I  
 Hol-DNA GAA TTC GTG GCT TAA TGC CTA GGT GTT GAC CCT AAG AAG TAC AAA TAC CAT TCA GAG AAG  
 Hol-Prt E F V A Q C L G V D P K K Y K Y H S E K  
 UroL-DNA GAA TTT GTG GCA TAA TGT CTT GGG GTT GAT Cct aag aag TAT AAG TAT CAT Tca gag aaa  
 UroL-Prt E F V A Q C L G V D P K K Y K Y H S E K  
 Pw-DNA GAG TTT GTT GCT TAA TGT TTA GGA GTT GAT CCT AAA AAA TAC AAA TAC CAT TCA GAA AAG  
 Pw-Prt E F V A Q C L G V D P K K Y K Y H S E K  
 Sn-DNA GAA TTT GTG GCT TAA TGC CTT GGA CTT GAT CCC AAA AAG TAC AGG TAT CAC TCT GAA AAG  
 Sn-Prt E F V A Q C L G L D P K K Y R Y H S E K  
 Sl-DNA GAG TTC GTT GCT CAA TGC CTT GGT GTT GAC CCA AAG AAG TAT AAA TAT CAC TCT GAG AAA  
 Sl-Prt E F V A Q C L G V D P K K Y K Y H S E K  
 Sh-DNA GAA TTT GTT GCT TAA TGC CTA GGA GTA GAT CCT AAA AAG TAT AAG TAT CAC AGT TCA GAG  
 Sh-Prt E F V A Q C L G V D P K K Y K Y H S S E

4381 MDS 32 MDS 33 41 mds 41 44 46 MDS 40 4440

Ug1-DNA TAA AAG TCT AAT GAT ATA ... AAT GAT GAT ACT GCT Cat ata aAG AAG GCT ATT TTG TCT  
 Ug1-Prt Q K S N D I ... N D D T A H I K K A I L S  
 Ug2-DNA TAA AAG TCT AAT GAT ATA ... AAT GAT GAT ACT GCT Cat ata aAG AAG GCT ATC TTG TCT  
 Ug2-Prt Q K S N D I ... N D D T A H I K K A I L S  
 Hol-DNA AAG AAT TCA GTA GAT GGT ... GTA GAA GAC TCA GGC CCA GTT AGT AAT CCA ATT CTG CAT  
 Hol-Prt K N S V D G ... V E D S G P V S N P I L H  
 UroL-DNA aag AGA GAT GAT GGA GCA GAT GGT AAT GAT atg ggc cAA ATT CAA AAT CCT ATC ttg caa  
 UroL-Prt K R D D G A D ... G N D M G Q I Q N P I L Q  
 Pw-DNA AAG AGA GAT GAT AAT GTT ... GGA GAT gat atg GGA AAT GTT CAA AAC CCT ATT ttg taG  
 Pw-Prt K R D D N V ... G D D M G N V Q N P I L Q  
 Sn-DNA AAG AAT ACT GAT AAT CCA ... ACT GAT GAC CCT TTG ATA GTT TCG AAT CCC GTC CTT TAA  
 Sn-Prt K N T D N P ... T D D P L I V S N P V L Q  
 Sl-DNA AAG AAT ACA GAT GAA ATA ... GGT GAT GAT Ggt gga tCA ATC TAG aat cct att CTT TAA  
 Sl-Prt K N T D E I ... G D D G G S I Q N P I L Q  
 Sh-DNA AAG AAA ACT GGA GAA ACC AAT AAT GAT GAT GGA ACA TTG ATT TAG AAT CCA ATC TTG TAA  
 Sh-Prt K K T G E T N N D D G T L I Q N P I L Q



4441 MDS 34 42 42 45 47 4500

Ug1-DNA GAA GAA ACA GAA AAT AAA TTA AAA TAA AGA TCT ATA GCC TAT TTG AAA GTT GTA TGC ...

Ug1-Prt E E T E N K L K Q R S I A Y L K V V C ...

Ug2-DNA GAA GAA ACA GAA AAT AAA TTA AAA TAA AGA TCT ATA GCC TAT TTG AAA GTT GTA TGC ...

Ug2-Prt E E T E N K L K Q R S I A Y L K V V C ...

Hol-DNA ACT GAG ACT GAA AAG AGT TTG AAG CAC AGA TCA ATT GCC GAA TTA AAG ATA AGA TGC CTT

Hol-Prt T E T E K S L K H R S I A E L K I R C L

UroL-DNA ACA GAA ACA GAA AAA AGT TTA AAG AAT AGA TCA ATA GCA GAA CTT AAA GTG AAG TGC ...

UroL-Prt T E T E K S L K N R S I A E L K V K C ...

Pw-DNA ACA GAA ACT GAG AAA AGT CTT AAA AAT AGA TCT ATT GCA GAA TTG AAA GTA AAA TGT ...

Pw-Prt T E T E K S L K N R S I A E L K V K C ...

Sn-DNA ACT GAG ACG GAA AGA TCT CTT AAG AAT AGA ACT GTG GCT GAG CTT AAC ATC AAG TGC ...

Sn-Prt T E T E R S L K N R T V A E L N I K C ...

Sl-DNA ACT GAA ACT GAA AAA AGT CTT AAA CAC AGA TCA ATT GCC GAG CTT AAA GTK AAA TGC ...

Sl-Prt T E T E K S L K H R S I A E L K V K C ...

Sh-DNA ACT GAA ACT GAA AGA AGT TTA AAG GGA AGA ACT ATT GCT GAG TTG ACA ATT AAA TGT ...

Sh-Prt T E T E R S L K G R T I A E L T I K C ...

4501 MDS 43 mds 43 46 48 4560

Ug1-DNA ... TTT TCC TGT CAT TTA GAA TAA GAA TTC CCA GGT GTG TTT TAA ... AAG AAT GGA

Ug1-Prt ... F S C H L E Q E F P G V F Q ... K N G

Ug2-DNA ... TTT TCC TGT CAT TTA GAA TAA GAA TTC CCA GGT GTG TTT TAA ... AAG AAT GGA

Ug2-Prt ... F S C H L E Q E F P G V F Q ... K N G

Hol-DNA GGT CCH GAC TGC GGT GAA TAT TAT TTC CCT GGT ATA TAT CAA GAA GGC AAA ...

Hol-Prt G P F C G E Y Y F P G I Y Q E G K ...

UroL-DNA ... CCT TAT TGT TAA GAA TAA TAT AGC TTC CCT GGA ATC TAT TAG GAA ATT AAA AAA ...

UroL-Prt ... P Y C Q E Q Y S F P G I Y Q E I K K ...

Pw-DNA ... CCA TTC TGC TAA GAG TTC Ttt gat ttt CCA GGA GTT TAT Taa gag ggt AAA ...

Pw-Prt ... P F C Q E F F D F P G V Y Q E G K ...

Sn-DNA ... CCT CAT TGT GCT CAT AAT TAT CAC TTC CCA GGA ATC CTT GTC CCC AGC TCA AAC AAT

Sn-Prt ... P H C A H N Y H F P G I L V P S S N N

Sl-DNA ... CCA TCT TGC ACT Cat aat tat gaC TTC CCA GGT Att tac caa gaa gga aaA ...

Sl-Prt ... P S C T H N Y D F P G I Y Q E G K ...

Sh-DNA ... CCA CAC TGT TCT GAG AGT TAT CAC TTC CCA GGA ATC TTC CAA GAT GGC AAG AAC AAT

Sh-Prt ... P H C S E S Y H F P G I F Q D G K N N

4561 MDS 44 44 47 49 4620

Ug1-DNA ACC ... ATT TCT GGG CTT GTT TGC TAA AAA CCC GAC TGT GGT GTG AAA TTT TCT GAT CAA

Ug1-Prt T ... I S G L V C Q K P D C G V K F S D Q

Ug2-DNA ACC ... ATT TCT GGG CTT GTT TGC TAA AAA CCT GAC TGT GGT GTG AAA TTT TCT GAT CAA

Ug2-Prt T ... I S G L V C Q K P D C G V K F S D Q

Hol-DNA ... GAC GTA AGT GGT CTA GTT TGC AAA AAA ... TGC AAC GGA GGC ATT CCC GAA TAA

Hol-Prt ... D V S G L V C K K ... C N G G I P E Q

UroL-DNA ... GAA GCT TCA GGA ATG AAC TGT ATT AAA ... TGC AAT AAA AAA CTG CCT CAG CAG

UroL-Prt ... E A S G M N C I K ... C N K K L P Q Q

Pw-DNA ... GAG ATA ACT GGA ATG AAT TGT ATT AAA ... TGC TAA CAG AAG ATT CCA GAG TAA

Pw-Prt ... E I T G M N C I K ... C Q Q K I P E Q

Sn-DNA ACA GAG CTC ACA GGT TTA GCT TGC GTG AAA ... TGC AAT TAG CGC ATC CCT GAT GCC

Sn-Prt T E L T G L A C V K ... C N Q R I P D A

Sl-DNA ... GAT GTG TCT GGC TTR ATT TGY ACT AAA ... TGC AAT GCT AAG ATA CCA GAA AAA

Sl-Prt ... D V S G L I T K ... C N A K K I P E K

Sh-DNA ACT ... CTC TCA GGT TTA CTC TGC ATA AAA ... TGC ACC TAG CCA ATT CCA GAA GCC

Sh-Prt T ... L S G L L C I K ... C T Q P I P E A



Pw-DNA ... ..  
 Pw-Prt ... ..  
 Sn-DNA ... ..  
 Sn-Prt ... ..  
 Sl-DNA ... ..  
 Sl-Prt ... ..  
 Sh-DNA ... ..  
 Sh-Prt ... ..

4861 **MDS 41\*** **MDS 45** 4920  
 Ug1-DNA TTT ATT ATA GCT TAT TAA GAG TGT TCG GAA TAT TCT TGC ... TAA AAG AAA ACT CGC CAA  
 Ug1-Prt ... .. Y Q E C S E Y S C ... Q K K T R Q  
 Ug2-DNA ..t att atA GCT TAT TAA GAG TGC TCG GAA TAT TCT TGC ... TAA AAG AAA ACT CGC CAA  
 Ug2-Prt ... .. Y Q E C S E Y S C ... Q K K T R Q  
 Hol-DNA ... .. CCT TAT GAA TGC AAT GAA CCC CAT TGC ... AAG CAA AAG TCT AGA CAG  
 Hol-Prt ... .. P Y E C N E P H C ... K Q K S R Q  
 UroL-DNA ATT ATA ATA GGT AAC TTT AAT TGT TCA GAG ACT TCT TGC AAT AAT AAA GAT TGT AGA TAA  
 UroL-Prt ... .. N F N C S E T S N N T K K D C R R Q  
 Pw-DNA ... .. aat tat GAC TGC TTA GAG CCA TCC TGC ... AAA GCT AAA AGT AGA TAA  
 Pw-Prt ... .. N Y D C L E P S C ... K A K S R Q  
 Sn-DNA ... .. ATG AAA GAG TGC AAG GAG CCT CAG TGC ... GGC ATG AAA ACT AAT CAA  
 Sn-Prt ... .. M K E C K E P Q C ... G M K T N Q  
 Sl-DNA ... .. AAA TAT GAG TGC TAR GAG CCT TCT TGC ... AAG AGT ATG ACT CGT TAA  
 Sl-Prt ... .. K Y E C Q E P S C ... K S M T R R Q  
 Sh-DNA ... .. AAC AAG TAA TGC CAA GAG CCA GCT TGC ... GGA GCA GTT TCT CGC TAA  
 Sh-Prt ... .. N K Q C Q E P A C ... G A V S R Q

4921 **MDS 8** 4980  
 Ug1-DNA TTA ACA GTG AAG AAT AAA TGT GTA TTA CAA AAT TGC AAA GGA AAA CTA CAC CCT GAA TTT  
 Ug1-Prt L T V K N K C V L Q N C K G K L H P E F  
 Ug2-DNA TTA ACA GTG AAG AAT AAA TGT GTA TTA CAA AAT TGT AAA GGG AAA CTA CAC CCT GAA TTT  
 Ug2-Prt L T V K N K C V L Q N C K G K L H P E F  
 Hol-DNA Cta CTT GTG AAC AAT AAA TGT GTG ATA CCA ACT TGC AAA GGA AAA ATG ACA GCA GAA TAT  
 Hol-Prt L L V N N K C V I P T C K G K M T A E Y  
 UroL-DNA CTC TTG GTG AAC AAC AAG TGC ATC ATT CCA ACT TGC AAA GGT AAA ATG ATA GCA GAG TAC  
 UroL-Prt L L V N N K C I I P T C K G K M I A E Y  
 Pw-DNA TTG CTA GTT AAC AAT AAA TGT ATT AAC TTA ACT TGT AAG GGC AAA ATG GTA CCA GAA TAT  
 Pw-Prt L L V N N K C I I N L T C K G K M Y V P A E Y  
 Sn-DNA CTT CTA CTC AAT AAC AAA TGC ATT GTA AAG GGC TGC AAG GGT AAA ATG AAC TCA GAG TAT  
 Sn-Prt L L L N N K C I V K G C K G K M N S E Y  
 Sl-DNA CTC CTC TAT CAT AAC AAA TGT GTT AAT CTA ACT TGT AAG GGY AAR ATG GTA CCA GAA TAC  
 Sl-Prt L L Y H N K C V N L T C K G K M V P E Y  
 Sh-DNA CTC CTC TAC AAT AAC AAA TGC ATT AAT TTA GCT TGC AAA CTG AAA AAT GAT ACC AGA TAT  
 Sh-Prt L L Y N N K C I N L A C K L K N D T R Y

4981 **MDS 46** **MDS 45** 5040  
 Ug1-DNA TCA GAA TCA AAA ACA AAT GAT ACT CTT AGA TAC TTA CAA GGC CTA TTT GAT ATT GAA AAG  
 Ug1-Prt S E S K T N D T L R Y L Q G L F D I E K  
 Ug2-DNA TCA GAA TCA AAA ACA AAT GAT ACT CTT AGA TAC TTA CAA GGC CTA TTT GAT ATT GAA AAG  
 Ug2-Prt S E S K T N D T L R Y L Q G L F D I E K  
 Hol-DNA TCA GAA CAA CAA ACT AAC GAT ACT CTT AGA TAT ATT TAG GGT CTA TTC AAT GTA AGa acC  
 Hol-Prt S E Q Q T N D T L R Y I Q G L F N V R T  
 UroL-DNA ACC GAA TCC TAA ACT AAT GAC ACA TTG AGA TAT CTT CAG GGT CTT TTT AAC CTA AAG AAG  
 UroL-Prt T E S Q T N D T L R Y L Q G L F N L K K  
 Pw-DNA TCT GAA CAT taA ACA AAT GAC ACT CTT AGA TAT TTG CAA GGC TTA TTT AAT GTT AAA AAA  
 Pw-Prt S E H Q T N D T L R Y L Q G L F N V K K  
 Sn-DNA TCT GAG CTT AGA ATA AAC GAC Act ctt CGC TAC TTA GAA GGT CTT TTT AAT GTT AAG AAG  
 Sn-Prt S E S T R I N D T L R Y L E G G L F N V K K  
 Sl-DNA TCA GAG CAT CAA ACY AAC GMC ACA CTC AGA TAT CTT CAA GGC CTA TTT AMC ATT AAA AAA  
 Sl-Prt S E H Q T N DA T L R Y L Q G L F NT I K K  
 Sh-DNA ACT GAA TAA AAG ACT AAT GAT ACT CTC AGA TAT CTA TAA GGC TTG TTT AAT GTA AAG AAA  
 Sh-Prt T E Q K T N D T L R Y L Q G L F N V K K

5041 *MDS 9 35 47 48* *MDS 50* 5100

Ug1-DNA CAT AAT AAT GAG AAT AAA AAT TCA AAT AAC CTA AAG AAG GCA ATG CAT ... .. CCA GAT  
Ug1-Prt H N N E N K N S N N L K K A M H ... .. P D  
Ug2-DNA CAT AAT AAT GAA AAT AGA AAT TCA AAT AAC CTA AAG AAG GCA ATG CAT ... .. CCA GAT  
Ug2-Prt H N N E N R N S N N L K K A M H ... .. P D  
Hol-DNA TAC ATT CAC GAG AAT AAA TTG GCA AAG CAT GTA GAC GAT ATC ... .. CCT CAC  
Hol-Prt Y I H E N K L A K H V D D I ... .. P H  
UroL-DNA taC ATT CAT GAA TAA AAG AAA ACT ... .. GCA TTT AAG GAG AGT GAT ATT CCA AAT  
UroL-Prt Y I H E Q K K T ... .. A F K E S D I P N  
Pw-DNA TGC ATT CAT Gaa tCT AAG AAA CAG ATG GAA ATT AAG ... .. GAT GTT CCT TAC  
Pw-Prt C I H E S K K M E I K ... .. ... .. C V P Y  
Sn-DNA TTC TTG ATT GAA AAT GAA AAG TAC AGA AAG AAA TAC GAA AAA CCA GAG TTA GTG CCT AAT  
Sn-Prt F L I E N E K Y R K K Y E K P E L V P N  
Sl-DNA CAC CTt cat gAA GAC AGC AAA AAT GAT TCA TTR ... AAG GTT GAA ACC GAC ATC CCA TTC  
Sl-Prt H L H E D S K N D S L ... K V E T D I P F  
Sh-DNA TAC ATC CAA GAA AAT CAG AAA AAC GGC TGT GTG Cat aaa ACC GTA GAG GAA GTT CCA AAT  
Sh-Prt Y I Q E N Q K N G C V H K T V E E V P N

5101 5160

Ug1-DNA CAA ATA GAA TAT GAT AAT ATA AAA GGT GTT ATT GAT ACT GTA TTA ATG AGG AGC AAA TAT  
Ug1-Prt Q I E Y D N I K G V I I D T V L M R S K Y  
Ug2-DNA CAA ATA GAA TAT GAT AAT ATA AAA GGT GTT ATT GAT ACT GTA TTA ATG AGG AGC AAA TAT  
Ug2-Prt Q I E Y D N I K G V I I D T V L M R S K Y  
Hol-DNA TCC TAA TCA TAC AGC GTA TTA AAG ACT AAA GTA GAC AGT GTA ATG GAG AGA AGT AAG TAT  
Hol-Prt S Q S Y S V L K T K V D S V M E R S K Y  
UroL-DNA TGG GAA AAC TTT TAA GCA CTT CAA CAA AAG GTG GAC ACA GTC ATA AAT AGA AGC AAG TAC  
UroL-Prt W E N F Q A L Q Q K V D T V I N R S K Y  
Pw-DNA TTC TAG TAA TAC TAG TAA CTT CAA GAG AGA GTG GAT GAA GTT ATG AAT AGA AGT TCA TAC  
Pw-Prt F Q Q Y Q Q L Q E R V D E V M N R S S Y  
Sn-DNA TTC CAA TCA TTC AAA GAG CTT TAA AAG AAG GTT GAA TCT TTT ATG ATA AGA AGC GGA TAC  
Sn-Prt F Q S F K E L K K V V E A F M I R S G Y  
Sl-DNA TAT AAT GAA TAT AAT GTT TTA CAG ACA AAA GTW GAT GAA CTA ATG AAT AGA AGT AAA TAT  
Sl-Prt Y N E Y N V L Q T K V D E L M N R S K Y  
Sh-DNA TTC GAT GCA TTT GCC AGA ATG TAA GGA AAA GTT GAT GAT ATT ATG ATT CGC AGC AAA TAT  
Sh-Prt F D A F A R M Q G K V D E F M I R S K Y

5161 5220

Ug1-DNA AAT AAG GTA GAC CTA AGC CAA ATA TTT AGT TTT ATC AGC TTT AAT AAT TGA TTG GTA ATA  
Ug1-Prt N K V D L S Q I F S F I S F N N \* ... ..  
Ug2-DNA AAT AAG GTA GAC CTA AGT CAA ATC TTT AGT TTT ATC GGC ATT AAT AAT TGA TTG GTA ATA  
Ug2-Prt N K V D L S Q I F S F I G I N N \* ... ..  
Hol-DNA AAT AAA GTG GAT CTC AAG AAC ATT TTC AGT TTC ATG GCG AAG TGA GAC AAC ATA AGT AAT  
Hol-Prt N K V D L K N I F S F M A K \* ... ..  
UroL-DNA AAC AAA GTA GAC CTT AGC AGC ATT TTC AAG ATT TTC ATG AGA AAA AAC AAA TCA GCT GTT TAA  
UroL-Prt N K V D L S S I F N F M R K N K S A V Q  
Pw-DNA AAT AAA GTG GAT CTA GGA AGT ATT TTC AGT TTT ATG AAG CTA GCA AAA GCA TAG TGA TTT  
Pw-Prt N K V D L G S I F S F M K L A K A Q \* ... ..  
Sn-DNA AAC AAA GTC GAT TTA GGC AAT ATT TTC GGT TTT ATG AGC AAG GGA GCT AAT CCT CAC TAA  
Sn-Prt N K V D L G N I F G F M S K G A N P H Q  
Sl-DNA Acc AAG GTT GAC YTA GGA AGT ATA TTY GGC TTC ATG AGG TAG AGC AAT AAT AAA ATG GCT  
Sl-Prt T K V D L G S I F G F M R Q S N N K M A  
Sh-DNA AAC AAA GTA GAC CTC AGC AGC ATA TTC AAC TTC ATG AAG CTT GGA AAG TAA CAA TGA AAA  
Sh-Prt N K V D L S S I F N F M K L G K Q Q \*

5221 MDS 51 5280

Ug1-DNA ATT TTA ATA AAT AAC AAA TTT TCT TTG TTT ATT AAC TTT TAT ATT AAT ggg gtt ttg ggg

Ug2-DNA ATT TTA ATA AAT AAC AAA TTT TCT TTG TTT ATT AAC TTT TAT ATT AAT ggg gtt ttg ggg

Hol-DNA TTA TCT AGA AAG CAT TTA ACT TGT AGA TTT ATT GTT TTA ATT TTA ATT TGG TAA AAT ATC

UroL-DNA TGA TTT TTA TTG GTA CCT TCG TTT TAT AAA TTA GTT AAT AGT CAT TTA ATC AAG TTA AAT

UroL-Prt \*

Pw-DNA ATG ATT TAT CAG TTA TTC ATA TAA AAT TTA ATT TTT ATT TTC TCC TTT ATT TTC TTT AAT

Sn-DNA CAA AAA ATG AGC ATT TTC TGA ATG GCG GCA TTT TGA TCA GAG TTA ATT TAT TTT ACT CAA

Sn-Prt Q K M S T F \* M A A F \*

Sl-DNA GTA AGT AGT ACG GCA ACT GCT TAA TGA AAA GAT TTT CAG TCA AAT TAA GTA CTT ATA TTT

Sl-Prt V S S T A T A Q \*

Sh-DNA AAT AAC AGT TCC tat atG TAT TAA GTT ATT ATA TTT TGT TTT AAT CAG AGT TAA TGT GTG

  

5281 5340

Ug1-DNA ttt ... ..

Ug2-DNA ttt ... ..

Hol-DNA CCT TTA ACC TTT CAC TAA TGG GTT ATT ggg gtt ttg ggg ttt tgg ggt ttt ggg g.. ...

UroL-DNA TTA TTT TAT GCT AAA ACT ATA ATA ATT GAT CTC ACg ggg ttt tgg ggt ttt ggg gtt ttg

Pw-DNA TTA AAG AAT CAT TAT AAT Tgg ggt ttt ... ..

Sn-DNA ATT CCT TAA GAA CAA GAT AAA CCT CGC GCC TTT TAA GAG GTT ATC TGC ATT TAA TGC ATT

Sl-DNA ATG TGT TGM GAA AAA GGA GTA TTT TTT GGA AAG ATA TAT GAT TTA TTA ATA ATA AAA GAG

Sh-DNA AGC ATA TAT CAA AGA AAT CAT TTA CAC TCA GGT TGT AGA TAT ATA TGC CAC CTA ATA TTA

  

5341 5400

UroL-DNA ggg ttt tgg gg. ... ..

Sn-DNA CAT TTA GTT TAT AAA TTT ACA CAA AAA ACT Tgg ggt ttt ggg gtt ttg ggg ... ..

Sl-DNA TAW TTT AAT CTT TGC TTG CAG GGT TTT AGC ATT TTg ggg ttt tgg ggt ttt ggg g.. ...

Sh-DNA ATA GAG CTT TTT ATT AAA TAA TTT TCA CTT AAT ATC TAg ggg gtt ttg ggg ttt tgg ggt
