# Supplementary material
Source: PubMed Central journal article supplement (PMC1257744)
Supplement: pnas_0507682102_3.pdf [file pnas_0507682102_3.pdf]

# MIC

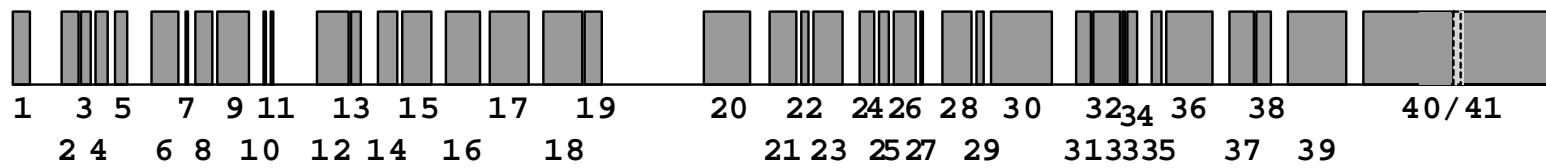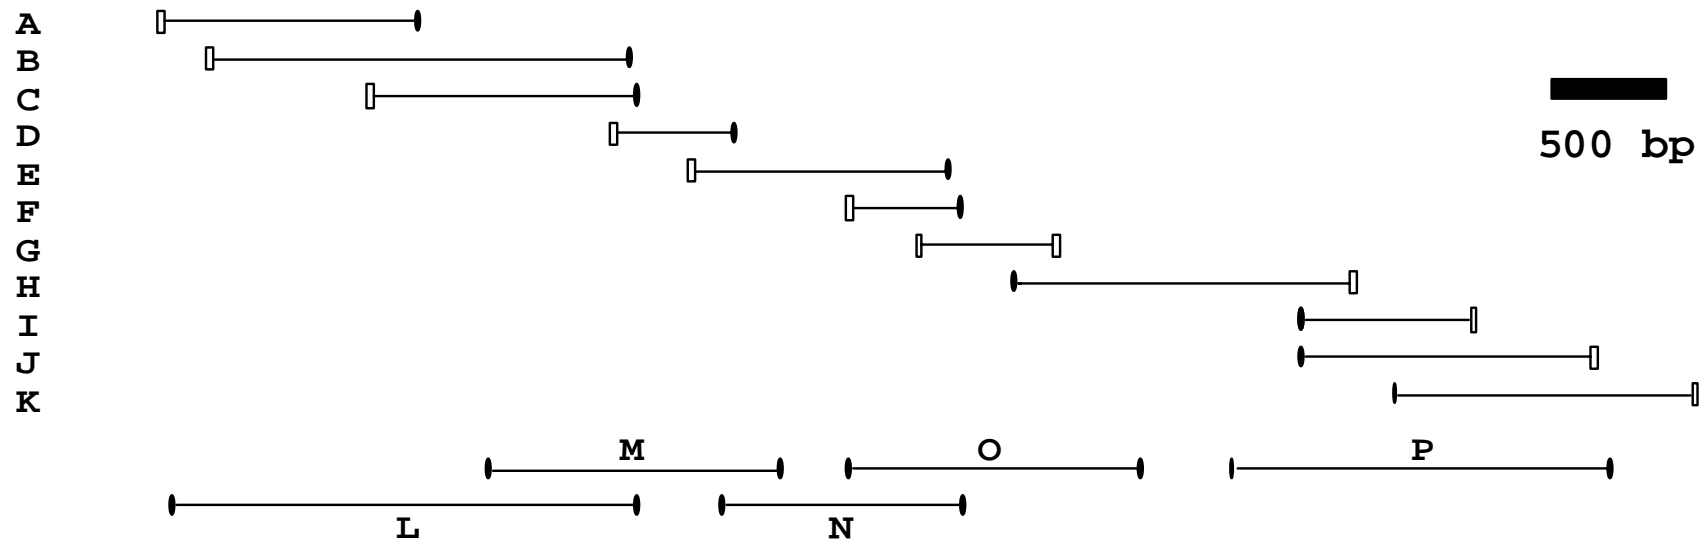

|   | Forward Primers                                 | Reverse Primers                                                    |
|---|-------------------------------------------------|--------------------------------------------------------------------|
| A | TATTATTTAAAAGAAAAATACCGCCTT                     | ATTCTTGAACAACATATTTTCCTATAATG                                      |
| B | AACTTCAAGTGAAGAGTGATTAAG                        | TCTTAATGTCCAAATAAATATATATGAG                                       |
| C | GAGGATATACCATACCAGCACATTAAG                     | AGCTACTTTGCACCTCCATTARCAA                                          |
| D | TCTTCTCAGAGTTGGATGGTATCAG                       | CAAGTCTTAAGAGCMAGGCAAAATTA                                         |
| E | GATAAAAGGACCTTGCTGGATAACA                       | CTAAACGAGGCACCCATTATTGAATT                                         |
| F | TTAGGATGGTGCTACTAATGATAAA                       | GGAACGTGTCAACTAATAGTTTTTCGAA                                       |
| G | TGCTCCTAGCACGTATTCAATGGCT                       | TAGAATTCATGCAAGAGCAGCATCTC                                         |
| H | CTCTTATCTCACTTTCTCTTATTTTT                      | ACAATATCCTCTCTTTATTGTCCAC                                          |
| I | GGACTTTTCAAATCCCTCTTATCTT                       | GCAATAAAATCTGCCTCAATTC                                             |
| J | GGACTTTTCAAATCCCTCTTATCTT                       | TTATCTAAAAGCAATAAAATGCTTCAAG                                       |
| K | CTAAAGCACTGCCACATGTATTTTTATGT                   | ATTAATATAAAAGTTAATAAACAAAGAAAATTTG                                 |
| L | TGGCTCTAATCACGCTTTTC<br>TTTTGGCTCTAATTATGCTTTTC | AGCTACTTTGCACCTCCATTARCAA                                          |
| M | CCTATCAAACAGCTTTAGATCATTCTATTTTATTC             | TTGTACCGTTAATAATTATCAATTCATCC                                      |
| N | TCCACCACTCACAGCACTTTGAATTTAATTTGCC              | CTTGGCTGATAGGAASGTGTCACTAATAGTTTTC                                 |
| O | AAGTTAGAAAGGTGCCAATATATAAATTAGGATGG             | TGGTGAAGCATAAGTTGTATTCCTAGATAATAATA                                |
| P | TATAGCTGCACCTATTAGAATTTATATTAC                  | CCGAACACTCTTAATAAGCTATAATAAATTA<br>CCGAGCACTCTTAATAAGCTATAATAATTTA |
